1 ***Listeria monocytogenes* utilizes the ClpP1/2 proteolytic machinery for fine-tuned**  
2 **substrate degradation under heat stress**

3  
4 Dóra Balogh<sup>1,†</sup>, Konstantin Eckel<sup>1,†</sup>, Christian Fetzer<sup>1</sup>, Stephan A. Sieber<sup>1,\*</sup>

5  
6 <sup>1</sup>Department of Chemistry, Chair of Organic Chemistry II, Center for Functional Protein  
7 Assemblies (CPA), Technische Universität München, 85748 Garching, Germany

8 †These authors contributed equally to this work.

9 \*For correspondence: [stephan.sieber@tum.de](mailto:stephan.sieber@tum.de)

10  
11

12 **Abstract**

13 *Listeria monocytogenes* exhibits two ClpP isoforms (ClpP1/ClpP2) which assemble  
14 into a heterooligomeric complex with enhanced proteolytic activity. Herein, we  
15 demonstrate that the formation of this complex depends on temperature and reaches  
16 a maximum ratio of about 1:1 at heat shock conditions, while almost no complex  
17 formation occurred below 4°C. In order to decipher the role of the two isoforms at  
18 elevated temperatures, we constructed *L. monocytogenes* ClpP1, ClpP2 and ClpP1/2  
19 knockout strains and analyzed their protein regulation in comparison to the wild type  
20 (WT) strain via whole proteome mass-spectrometry (MS) at 37 °C and 42 °C. While  
21  $\Delta clpP1$  strain only altered the expression of very few proteins,  $\Delta clpP2$  and  $\Delta clpP1/2$   
22 strains revealed the dysregulation of many proteins at both temperatures. These  
23 effects were corroborated by crosslinking co-immunoprecipitation MS analysis. Thus,  
24 while ClpP1 serves as a mere enhancer of protein degradation in the heterocomplex,  
25 ClpP2 is essential for ClpX binding and thus functions as a gatekeeper for substrate  
26 entry. Applying an integrated proteomic approach combining whole proteome and  
27 co-immunoprecipitation datasets, several putative ClpP2 substrates were identified in  
28 the context of different temperatures and discussed with regards to their function in  
29 cellular pathways such as the SOS response.

30

## 31 Introduction

32 *Listeria monocytogenes* is a highly stress resistant pathogenic bacterium that can  
33 survive under rapidly changing conditions (Bucur et al., 2018; Radoshevich & Cossart,  
34 2018). In order to cope with different stresses, the cells must detect environmental  
35 changes and promptly adjust protein expression as well as turnover in a strictly  
36 regulated manner. One characteristic trait of *L. monocytogenes* is its growth at various  
37 temperatures ranging from  $-0.4$  to  $+45$  °C posing a major challenge for adapting its  
38 cellular physiology (Bucur et al., 2018). For example, heat shock induces the SOS  
39 response which is initiated by autocleavage of LexA, the repressor of the SOS genes  
40 (Michel, 2005; van der Veen et al., 2007). N- and C-terminal LexA domains (NTD and  
41 CTD, respectively) are further digested by bacterial proteases such as ClpXP (see  
42 below) to activate the SOS pathway (Cohn et al., 2011; Little & Gellert, 1983; Neher et  
43 al., 2003). In *L. monocytogenes*, 28 genes have been identified to be under control of  
44 LexA (van der Veen et al., 2010). Most of them are DNA polymerases required for  
45 DNA repair. Furthermore, the induction of the SOS pathway inhibits bacterial growth,  
46 probably in order to prevent cell division after incomplete DNA replication (Kawai et al.,  
47 2003; van der Veen et al., 2010).

48 In addition to gene regulation, heat stress generates damaged proteins, which need to  
49 be efficiently removed by the cellular proteolytic machinery. In bacteria, several  
50 proteases are capable of this process. These include caseinolytic protease P (ClpP)  
51 which, in concert with its cognate chaperones, digests misfolded protein substrates.  
52 ClpX is a hexameric ATP-dependent chaperone which recognizes protein substrates  
53 and directs unfolded peptide chains into the tetradecameric barrel of the ClpP serine  
54 protease for degradation (Baker & Sauer, 2012). Some bacteria such as  
55 *L. monocytogenes* encode two ClpP isoforms (ClpP1 and ClpP2) with yet largely  
56 unknown cellular roles (Dahmen et al., 2015; Hall et al., 2017; Mawla et al., 2020; Pan  
57 et al., 2019; Zeiler et al., 2011). In *L. monocytogenes* ClpP1 exhibits low sequence  
58 homology to ClpP isoforms from other bacteria and is expressed as an inactive  
59 heptamer with an impaired catalytic triad. Co-expression with ClpP2, a close homolog  
60 of other ClpP isoforms, yields a heterotetradecamer assembly composed of one ClpP1  
61 and one ClpP2 heptamer ring, ClpP1<sub>7</sub>P2<sub>7</sub>, here referred to as ClpP1/2 (Dahmen et al.,  
62 2015). In association with ClpX, this heterocomplex exhibits enhanced proteolytic  
63 activity in comparison to the corresponding uniform ClpX<sub>6</sub>P2<sub>14</sub> complex. Structural  
64 studies revealed that within this complex ClpP2 serves as a template to force the

65 impaired catalytic triad of ClpP1 into an aligned conformation which enables substrate  
66 digestion (Dahmen et al., 2015). Moreover, recent cryo-EM data confirmed that ClpX  
67 solely docks via ClpP2 to the heterocomplex as ClpP1 lacks cognate chaperone  
68 binding sites (Gatsogiannis et al., 2019). It is thus assumed that ClpP1 is needed by  
69 *L. monocytogenes* under certain conditions to enhance proteolytic turnover and  
70 clearance of misfolded proteins.

71 It is hitherto unknown why some bacteria have homotetradecameric and others  
72 heterotetradecameric ClpPs. In this study, we revealed the thermosensing ability of  
73 ClpP1/2 heterooligomerization and investigated the unique cellular functions of ClpP1  
74 and ClpP2 in *L. monocytogenes*. To achieve this, the phenotypes of  $\Delta clpP1$ ,  $\Delta clpP2$   
75 and double knockout ( $\Delta clpP1/2$ ) strains were examined in an integrative proteomic  
76 approach using mass spectrometry-based whole proteome analysis and  
77 co-immunoprecipitation. Our data suggest that ClpP2 plays an important role to  
78 mediate substrate recognition of e.g. proteins involved in stress response while ClpP1  
79 is a mere enhancer of proteolytic turnover.

80

## 81 **Results**

82

### 83 **ClpP1 and ClpP2 form a heterocomplex at elevated temperatures**

84 Previous transcription analyses showed that both *clpP* genes exhibit up to 7-fold higher  
85 expression levels under heat stress (Dahmen et al., 2015; van der Veen et al., 2007),  
86 indicating that heterocomplex formation is preferred at high temperatures and might  
87 have a specific biological role under these conditions. In line with this observation,  
88 heterologous co-expression and purification of *L. monocytogenes* ClpP1/2 in *E. coli*  
89 revealed that the heterocomplex is unstable at low temperatures (4 °C) and stable  
90 tetradecameric ClpP1/2 could only be obtained when the whole purification process  
91 after cell lysis was performed at room temperature (~26 °C, Figure 1a,b). Interestingly,  
92 *M. tuberculosis* ClpP1 and ClpP2 also heterooligomerize at elevated temperatures  
93 (Leodolter et al., 2015), which suggests that heat sensing could be a conserved  
94 biological function of ClpP. To assess whether the temperature-dependent stabilization  
95 is a general feature of ClpP1/2 and not a result of the co-expression and purification  
96 conditions, we measured heterooligomerization of separately overexpressed and  
97 purified ClpP1<sub>7</sub> and ClpP2<sub>14</sub> at different temperatures.

98

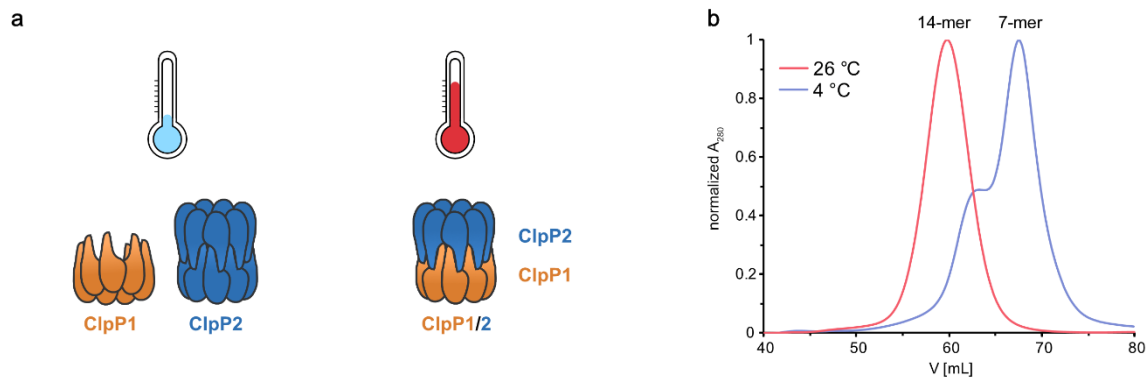

99  
100 **Figure 1 Purification of ClpP1/2 at 4°C and at room temperature.** a Schematic representation of  
101 ClpP1 (orange) and ClpP2 (blue) compositions at different temperatures according to size-exclusion  
102 chromatography. b Size-exclusion chromatography was performed on a Superdex200pg 16/60 column  
103 of co-expressed ClpP1/2 purified at 4 °C and 26 °C. Purifications of *L. monocytogenes* ClpP1/2 at 4 °C  
104 yielded a mixture of heptameric ClpP1 and tetradecameric ClpP2 (blue curve with shoulder), whereas a  
105 tetradecameric ClpP1/2 heterocomplex was obtained at room temperature (red curve).

106  
107 For this, equal amounts of both purified enzymes were mixed and incubated at  
108 temperatures ranging from 0 °C to 48 °C. The samples were subjected to analytical  
109 size-exclusion chromatography (SEC), and the protein composition of the  
110 tetradecamer peak was analyzed by intact protein mass spectrometry (ip-MS)  
111 (Figure 2a). The ratio of the tetradecamer (ClpP2<sub>14</sub> and ClpP1/2<sub>14</sub>) and heptamer  
112 peaks (ClpP1<sub>7</sub>) differed temperature-dependently with the highest 14-mer amount  
113 observed at 42 °C (Figure 2b). Ip-MS analysis revealed an increasing ClpP1 fraction  
114 within the tetradecameric complex up to 37-42 °C with a maximum content of about  
115 40-44% (Figure 2c). However, at 48 °C, the 7-mer:14-mer ratio declined to a 1:1 ratio.  
116 Accordingly, the ClpP1 partition decreased. As a control, the ClpP1/2 complex  
117 assembled at 42 °C was cooled down to 0 °C which resulted in a disassembly of the  
118 newly built heterooligomers suggesting that heterocomplex formation is reversible  
119 (Figure 2d). In order to rule out the existence of ClpP1<sub>14</sub> homocomplexes, we incubated  
120 ClpP1 at 42 °C. No shift in the chromatogram compared to 0 °C occurred, which implies  
121 that ClpP1 is not able build homotetradecamers even under elevated temperatures  
122 (Figure 2e).

123 ClpP1 is not active by itself, however, in association with the heterocomplex it exhibits  
124 ten times higher protease activity per subunit compared to the ClpP2 homocomplex  
125 (Balogh et al., 2017; Dahmen et al., 2015). In order to assess whether the  
126 heterocomplex formation translates to increased protease activity at high  
127 temperatures, we monitored the degradation of GFP-SsrA by ClpXP in the presence

128 of an ATP regeneration system (Kim et al., 2000). Using this assay, we compared the  
129 protease activity of mixed ClpP<sub>17</sub> and ClpP<sub>214</sub> to solely ClpP<sub>214</sub> at different  
130 temperatures. While ClpP1 alone is known to be inactive because of its impaired  
131 catalytic triad (Ser98, His123, Asn172) and its inability to bind AAA+ chaperones  
132 (Balogh et al., 2017; Dahmen et al., 2015; Gatsogiannis et al., 2019; Zeiler et al., 2013),  
133 co-incubation with ClpP2 at 37 °C and 42 °C resulted in an elevated proteolytic activity  
134 compared to a ClpP2 homocomplex at the same respective temperature (Figure 3).  
135 The overall slower kinetics of the GFP degradation at 42 °C are attributed to the low  
136 thermal stability of ClpX and the ATP regenerating enzyme creatine kinase (Wu et al.,  
137 2011).

138

### 139 **Intracellular heterooligomerization of ClpP1 and ClpP2 under heat stress**

140 Next, we set out to investigate whether temperature-dependent heterooligomerization  
141 also occurs in living *L. monocytogenes* as a response to heat stress. For this purpose,  
142 we first quantified ClpP1 and ClpP2 levels via Western blot at low and high  
143 temperatures to investigate if the previously observed increased expression of both  
144 *clpP* genes translates to the protein level (Dahmen et al., 2015).

145

146

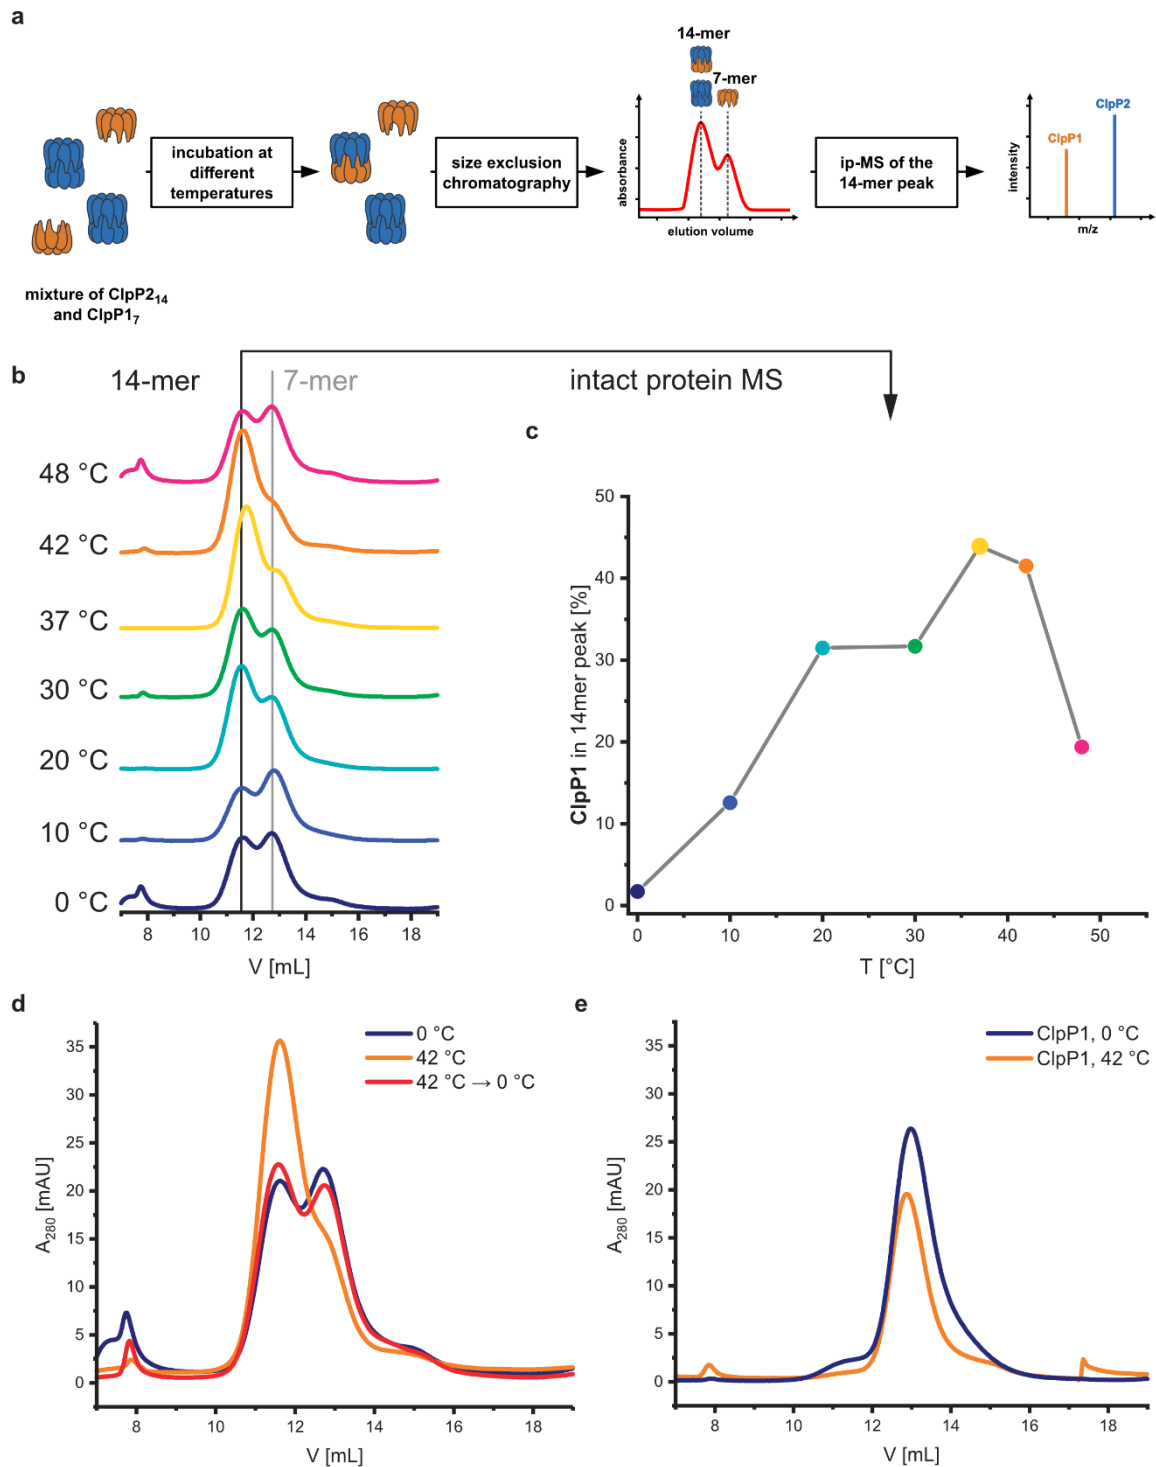

147

148

**Figure 2 Temperature-dependent formation of the ClpP1/2 heterocomplex.**

**a** Scheme of the SEC/ip-MS workflow. Orange: ClpP1, blue: ClpP2. **b** Size-exclusion chromatography

150 of ClpP<sub>17</sub> and ClpP<sub>214</sub> after incubation at the indicated temperatures for 30 min. Black line: tetradecamer,

151 gray line: heptamer. **c** Percentage of ClpP1 in the 14-mer peaks of panel b, measured by intact protein

152 mass spectrometry. **d** Size-exclusion chromatography of ClpP1/2 after incubation at 0 °C for 30 min

153 (blue), 42 °C for 30 min (orange) and 42 °C for 30 min followed by 0 °C for 30 min (red). **e** Size-exclusion

154 chromatography of ClpP<sub>17</sub> after incubation at 0 °C for 30 min (blue) and at 42 °C for 30 min (orange).

155

156

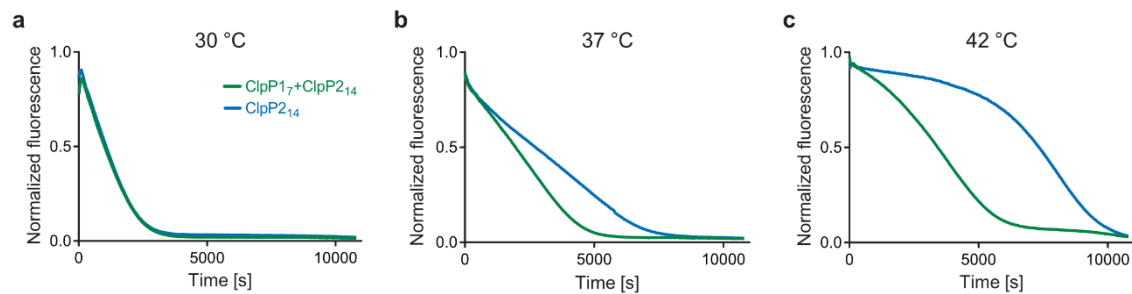

157  
158 **Figure 3 Protease activity of ClpP1<sub>7</sub> and ClpP2<sub>14</sub> at different temperatures.**  
159 ClpP (green line: 0.1 μM ClpP2<sub>14</sub> and 0.2 μM ClpP1<sub>7</sub>, blue line: 0.1 μM ClpP2<sub>14</sub>) and 0.4 μM ClpX were  
160 pre-incubated for 30 min at 30 °C (a), 37 °C (b) and 42 °C (c), subsequently the degradation of 0.4 μM  
161 GFP-SsrA was measured. Means of triplicates are shown. The experiments were independently  
162 repeated with qualitatively identical results (Figure S3).  
163

164 In order to detect ClpP isoforms selectively, we inserted a 2×myc tag at the end of the  
165 endogenous *clpP* genes. The *L. monocytogenes clpP1(191)::2×myc* and *L.*  
166 *monocytogenes clpP2(199)::2×myc* strains constitutively expressed C-terminally myc-  
167 tagged ClpP1 (ClpP1-2×myc) and ClpP2 (ClpP2-2×myc) respectively, which can be  
168 visualized with an anti-c-Myc antibody in a western blot. In addition, the myc-tag also  
169 allows for co-immunoprecipitation (co-IP) experiments to study the interaction of ClpP1  
170 and ClpP2 *in situ*.

171 Indeed, we observed strongly increased expression of both isoforms at elevated  
172 temperatures compared to 10 °C and 20 °C, corroborating previous gene expression  
173 studies (Figure S1) (Dahmen et al., 2015). This increase is especially pronounced for  
174 ClpP1, since its expression is lower compared to ClpP2 at temperatures < 42 °C. As  
175 both isoforms are highly abundant at elevated temperatures, we investigated a  
176 potential role of the proteins under heat stress.

177 Yet, the extremely low expression of ClpP1 at low temperatures represents a challenge  
178 for co-IP experiments when studying their temperature-dependent interactions *in situ*,  
179 especially when choosing ClpP1 as the bait protein. Despite this limitation, we carried  
180 out co-IP experiments at high and low temperatures with an immobilized anti-c-Myc  
181 antibody in the presence of a disuccinimidyl sulfoxide (DSSO) crosslinker to stabilize  
182 transient protein-protein interactions (Fux et al., 2019). The captured proteins were  
183 subjected to a tryptic digest, and the isolated peptides were measured by LC-MS/MS.  
184 As expected, when ClpP1-2×myc was used as bait no difference in ClpP2 enrichment  
185 could be observed at 42 °C compared to 20 °C (Figure S2a,b). This result is likely  
186 attributed to the low abundance of heptameric ClpP1 at 20 °C which under the huge  
187 excess of ClpP2 could form sufficient amounts of heterocomplex. In contrast, as ClpP2  
188 is generally abundant, it represents a more robust reference protein for this study. In

189 fact, when ClpP2-2xmyc was used as a bait, analysis of the ClpP1 intensities revealed  
190 a 6-times higher enrichment at 42 °C compared to 20 °C (Figure S2c,d). Despite this  
191 encouraging result, it is difficult to draw general conclusions due to the lack of a reliable  
192 ClpP1 expression at low temperatures.

193

#### 194 **Phenotypic characterization of *L. monocytogenes* $\Delta clpP$ mutants**

195 To further investigate the cellular role of ClpP1 and ClpP2, we constructed  $\Delta clpP1$  and  
196  $\Delta clpP2$  single mutants, as well as a  $\Delta clpP1/2$  double knockout strain (Figure 4a, top)  
197 in *L. monocytogenes* EGD-e (WT). Growth curves of the mutants show that the single  
198 mutants grow at a similar rate to the wild type strain but  $\Delta clpP2$  reaches a higher optical  
199 density in the stationary phase (Figure 4b, Figure S4). The double mutant  $\Delta clpP1/2$   
200 grows substantially slower than all other investigated strains, but shows the highest  
201 optical density in the stationary phase.

202 ClpP2 is known to be important for intracellular growth in macrophages and we thus  
203 investigated the impact of all mutants in this process as well (Gaillot et al., 2000).  
204 Mouse-derived macrophages were infected with *L. monocytogenes* EGD-e (WT),  
205  $\Delta clpP1$ ,  $\Delta clpP2$  and  $\Delta clpP1/2$  and colony forming units (CFUs) determined after 7  
206 hours (Figure 4c). All mutants were able to replicate inside the cells, with comparable  
207 growth behaviors as observed in medium. Contrary to previous findings (Gaillot et al.,  
208 2000), the intracellular growth of  $\Delta clpP2$  was only weakly inhibited which might be  
209 attributed to the use of a different strain by Gaillot et al. (*L. monocytogenes* LO28).

210 We next assessed the *in situ* activity of both ClpPs by labelling the whole *L.*  
211 *monocytogenes* cells with vibrilactone probe (VLP) (Figure 4d). Vibrilactone is the  
212 only known small molecule, which is able to label both ClpP1 and ClpP2 of *L.*  
213 *monocytogenes* by binding to their active site serine (Zeiler et al., 2011). VLP is  
214 equipped with a terminal alkyne tag which enables coupling to an azide-functionalized  
215 rhodamine dye via copper-catalyzed click chemistry (Huisgen, 1961; Rostovtsev et al.,  
216 2002; Tornøe et al., 2002). This way, proteins that covalently bind VLP can be  
217 visualized by fluorescence on a polyacrylamide gel. As observed previously, VLP is  
218 able to label both ClpP2 and ClpP1 in *L. monocytogenes* EGD-e (Figure 4a, bottom).  
219 In line with the lack of proteolytic activity (Dahmen et al., 2015; Zeiler et al., 2013), only  
220 a weak ClpP1 band is observed in  $\Delta clpP2$  which may result from some residual binding  
221 to the active site. In addition, as expected a strong ClpP2 signal is detected in  $\Delta clpP1$ .

222



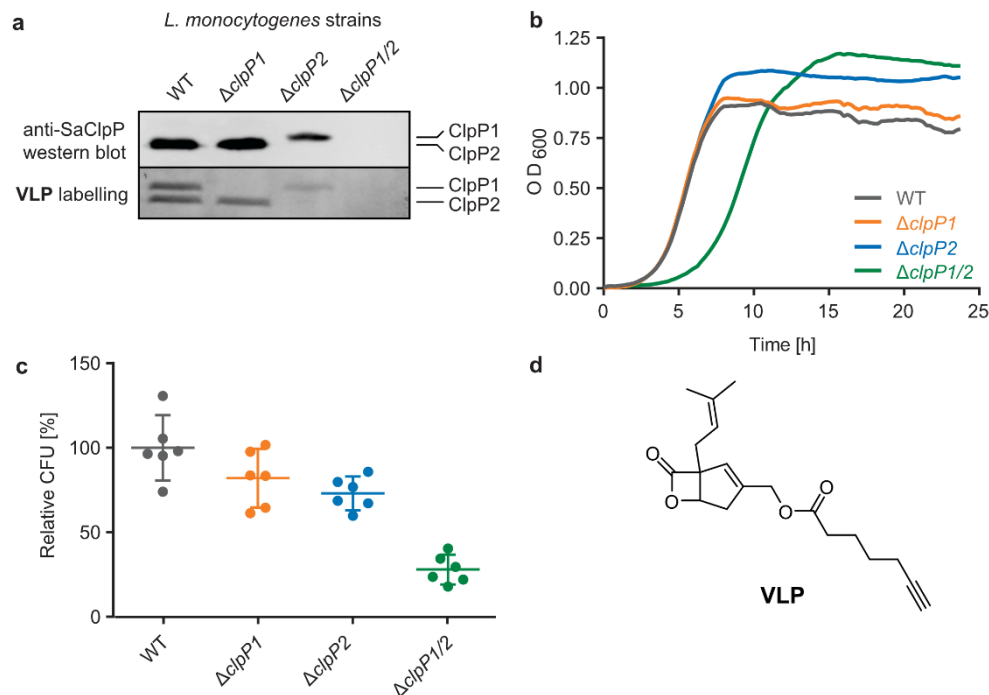

223

224 **Figure 4** *L. monocytogenes*  $\Delta clpP$  mutants. **a** Validation of the  $\Delta clpP$  mutants by western blot (top)  
225 and by fluorescent labelling with vibrilactone probe (bottom). **b** Growth curves of the  $\Delta clpP$  mutants in  
226 BHI medium at 37 °C. Means of triplicates are shown. The experiment was independently repeated with  
227 qualitatively identical results (Figure S4a). **c** Intracellular growth of the  $\Delta clpP$  mutants in murine  
228 macrophages. CFUs were determined after 7 h, and normalized to WT as 100% (n = 6, two independent  
229 experiments in triplicates were performed, mean  $\pm$  95% confidence interval). **d** Structure of the  
230 vibrilactone probe.

231

### 232 Whole-proteome analysis of ClpP1 and ClpP2 deletion mutants

233 ClpP is required for the maintenance and regulation of the proteome by clearing  
234 damaged proteins and degrading transcription factors. So far, the specific roles of  
235 ClpP1 and ClpP2 in *L. monocytogenes* are elusive. We analyzed whole proteomes of  
236 *L. monocytogenes* EGD-e (WT),  $\Delta clpP1$ ,  $\Delta clpP2$  and  $\Delta clpP1/2$  grown to early  
237 stationary phase at 37 °C and 42 °C to identify proteomic changes upon deletion of  
238 one or both proteins.

239 At 37 °C, the proteome of  $\Delta clpP1$  does not differ markedly from the wild type (Figure  
240 5a, Table S1) but in  $\Delta clpP2$  and in  $\Delta clpP1/2$  many proteins are dysregulated (Figure  
241 5b,c). The dysregulated proteins in  $\Delta clpP2$  and  $\Delta clpP1/2$  are highly overlapping: 89%  
242 of the proteins that are upregulated in  $\Delta clpP1/2$  compared to the wild type are also  
243 upregulated in  $\Delta clpP2$  and the same applies for 82% of the downregulated proteins in  
244 the double mutant (Figure 5d,e). However, a notable difference is the exclusive  
245 downregulation of 123 proteins solely in  $\Delta clpP2$  compared to the double mutant.  
246 Surprisingly, the different phenotypes of both mutants is not reflected by the respective  
247 proteome changes.

248

249 UniProt keyword and Gene Ontology Biological Process (GOBP) term analyses of the  
250 proteomic data were performed with the aGOTool (agotool.org) (Table S3 – Table S10)  
251 (Schölz et al., 2015). All proteins detected at 37 °C in the whole proteomes of  
252 *L. monocytogenes* EGD-e and all mutants were combined after categorical filtering and  
253 used as background. Among the upregulated proteins, the GOBP term "response to  
254 stimulus" and "regulation of transcription" was significantly enriched in both  $\Delta clpP2$  and  
255 in  $\Delta clpP1/2$  (Table S3). Notably, SOS response-related terms (cellular response to  
256 DNA damage stimulus, DNA repair) were specifically enriched only in  $\Delta clpP1/2$ . This  
257 indicates that both ClpPs are needed for full regulation of the SOS response in *L.*  
258 *monocytogenes*. Activation of the SOS response inhibits cell division in *L.*  
259 *monocytogenes* (van der Veen et al., 2007) and in *E. coli* (Miller et al., 2004), which  
260 rationalizes the observed slower growth of  $\Delta clpP1/2$  compared to the wild type.

261

262 Additionally, the class III heat shock proteins (CtsR, McsB, ClpB, ClpC, ClpE and the  
263 Lmo0230 protein) were upregulated in both  $\Delta clpP2$  and  $\Delta clpP1/2$ . The class I heat  
264 shock proteins were not overexpressed, except for their repressor, HrcA. Most of the  
265 class II HSPs (except for GlpK and BileA, which is also an SOS response protein) and  
266 their positive regulator  $\sigma^B$  were also not dysregulated. Of the 28 proteins, which have  
267 been found in a genome-wide screen for temperature sensitivity (Van Der Veen et al.,  
268 2009), only two (ClpB and AddA) were significantly upregulated in  $\Delta clpP2$  and  
269  $\Delta clpP1/2$ . This, and the fact that the class I and II heat shock proteins were not induced,  
270 highlights the differences between the stress caused by *clpP2* deletion and heat stress,  
271 even though class III heat shock proteins and parts of the SOS response are induced  
272 in the mutants lacking *clpP2*. Iron containing and iron-sulfur proteins were also  
273 significantly upregulated in  $\Delta clpP2$  and in  $\Delta clpP1/2$ . In *S. aureus*, it has been shown  
274 that ClpP degrades damaged iron-sulfur proteins (Flynn et al., 2003; Guillon et al.,  
275 2009), which could also be the case in *L. monocytogenes*. Additionally, ClpP has been  
276 connected to iron homeostasis and maintaining the oxidative balance inside the cell  
277 (Farrand et al., 2015; Frees et al., 2003; Michel et al., 2006).

278

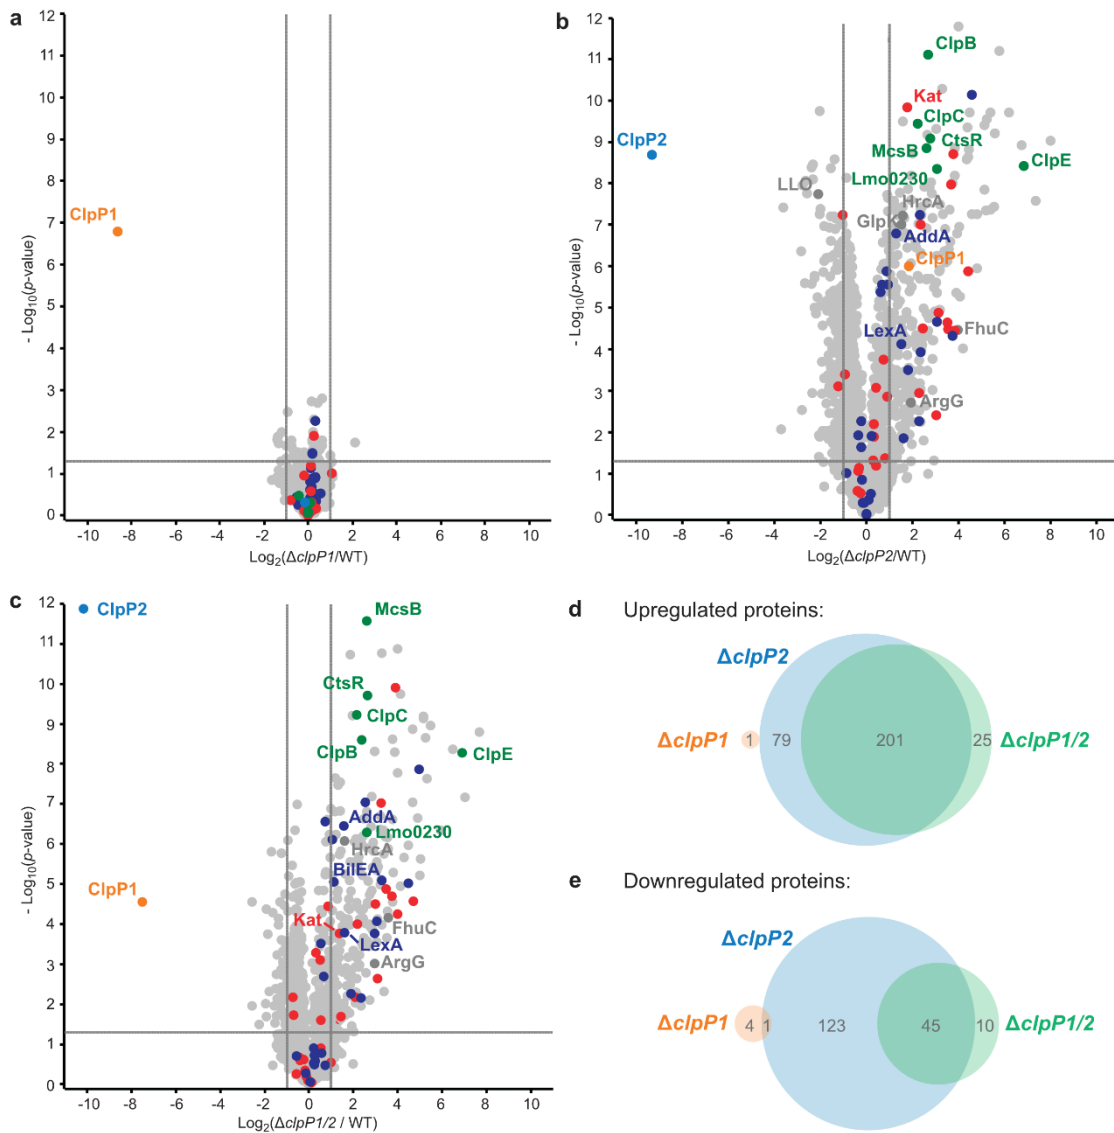

279

280 **Figure 5 Whole-proteome analysis of the *L. monocytogenes*  $\Delta clpP$  mutants at 37 °C.**

281 **a–c** Proteomes of *L. monocytogenes*  $\Delta clpP1$  (a),  $\Delta clpP2$  (b) and  $\Delta clpP1/2$  (c) compared to the WT .

282 Bacterial cultures were grown to stationary phase at 37 °C.  $-\log_{10} p$ -values from two-sample Student's

283 *t*-test are plotted against  $\log_2$  ratios of LFQ protein intensities. The vertical grey lines show 2-fold

284 enrichment, the horizontal grey lines show  $-\log_{10} t$ -test  $p$ -value = 1.3. Samples were prepared in

285 triplicates in two independent experiments ( $n = 6$ ). Class III heat shock proteins (green), SOS response

286 proteins (dark blue) and iron-containing proteins (red) are highlighted. Other proteins mentioned in the

287 text are highlighted in dark grey if they are significantly dysregulated in the respective plot. ClpP1 and

288 ClpP2 are shown in orange and blue respectively. **d–e** Venn-diagrams showing the up-(d) and

289 downregulated (d) proteins in the proteomes of the  $\Delta clpP$  mutants compared to the WT (fold

290 enrichment  $\geq 2$ ,  $-\log_{10} t$ -test  $p$ -value  $\geq 1.3$ , ClpP1 and ClpP2 excluded).

291

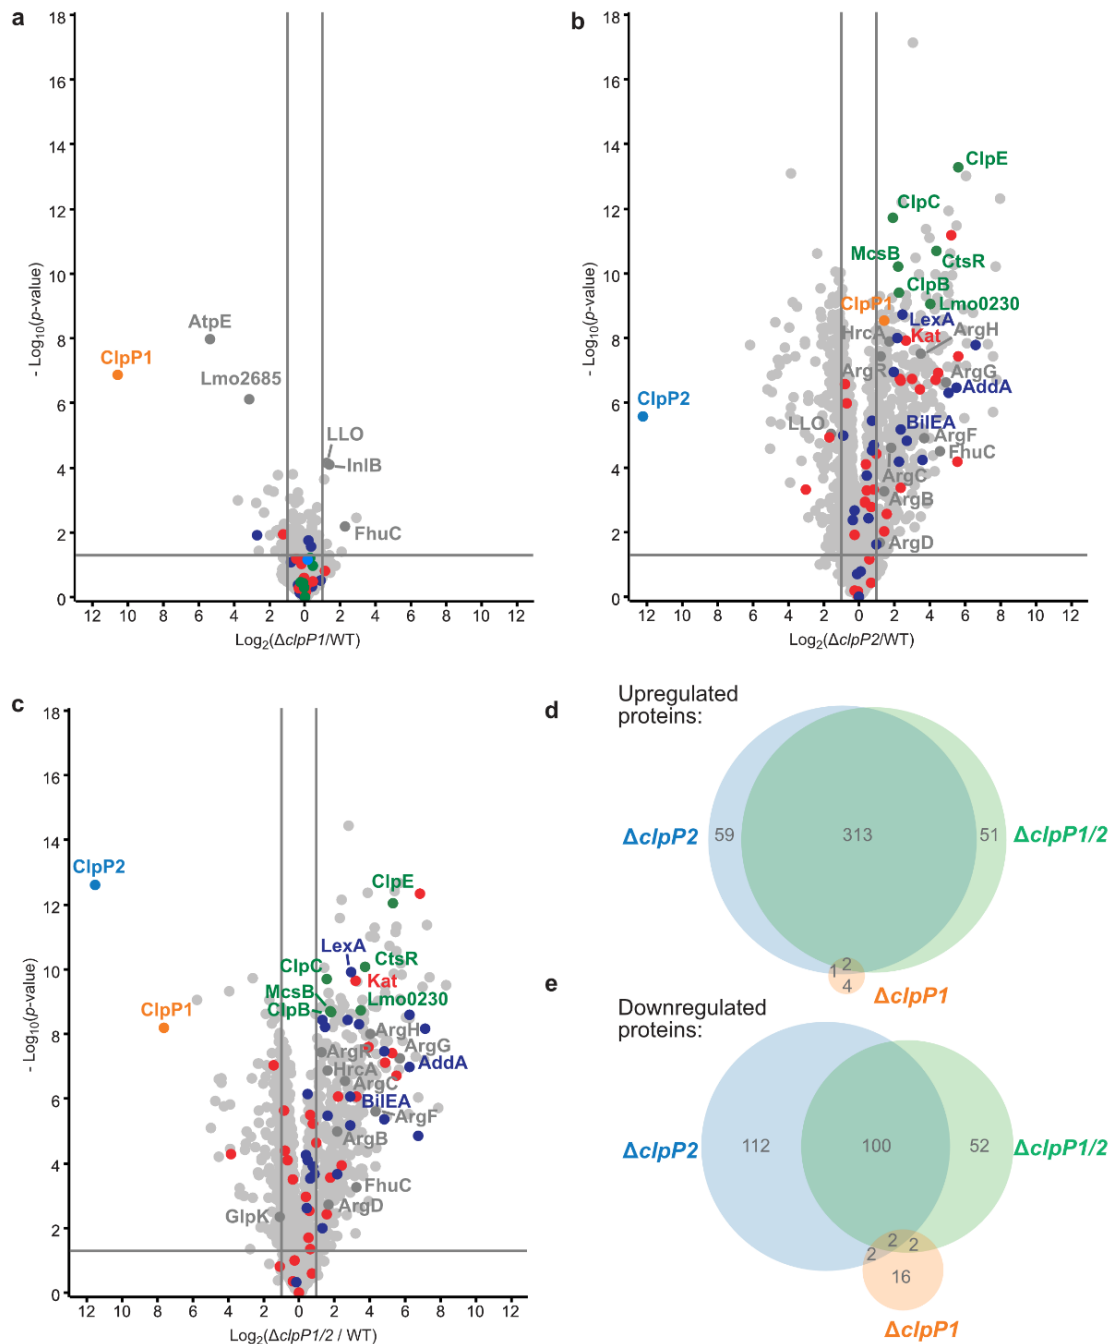

292  
 293 **Figure 6 Whole-proteome analysis of the *L. monocytogenes*  $\Delta clpP$  mutants at 42 °C. a–c**  
 294 **Proteomes of *L. monocytogenes*  $\Delta clpP1$  (a),  $\Delta clpP2$  (b) and  $\Delta clpP1/2$  (c) compared to the WT. Bacterial**  
 295 **cultures were grown to stationary phase at 42 °C.  $-\log_{10} p$ -values from two-sample Student's  $t$ -test are**  
 296 **plotted against  $\log_2$  ratios of LFQ protein intensities. The vertical grey lines show 2-fold enrichment, the**  
 297 **horizontal grey lines show  $-\log_{10} t$ -test  $p$ -value = 1.3. Samples were prepared in triplicates in two**  
 298 **independent experiments ( $n = 6$ ). Class III heat shock proteins (green), SOS response proteins (dark blue)**  
 299 **and iron-containing proteins (red) are highlighted. Other proteins mentioned in the text are**  
 300 **highlighted in dark grey if they are significantly dysregulated in the respective plot. ClpP1 and ClpP2 are**  
 301 **shown in orange and blue respectively. d–e Venn-diagrams showing the up-(d) and downregulated (d)**  
 302 **proteins in the proteomes of the  $\Delta clpP$  mutants compared to the WT (fold enrichment  $\geq 2$ ,  $-\log_{10} t$ -test**  
 303  **$p$ -value  $\geq 1.3$ , ClpP1 and ClpP2 excluded).**  
 304

305 At 42 °C, in general more proteins are dysregulated than at 37 °C in all whole  
306 proteomes. Although there are more proteins dysregulated for  $\Delta clpP1$  at 42 °C  
307 compared to 37 °C, there is surprisingly little impact of a ClpP1 deletion on the  
308 proteome level (Figure 6a, Table S2). Among the upregulated proteins are the two  
309 virulence-associated proteins internalin B (InIB) and listeriolysin O (LLO). Internalin B  
310 plays a role in receptor-mediated endocytosis of non-phagocytic cells, whereas  
311 listeriolysin O is a pore-forming toxin needed for subsequent vacuole opening to enter  
312 the cytosol of infected cells (Radoshevich & Cossart, 2018). In addition, FhuC is  
313 upregulated, which is an ABC ATPase involved in the membrane transport of  
314 iron(III)hydroxamates in *S. aureus* (Speziali et al., 2006).

315 The most significantly downregulated proteins for  $\Delta clpP1$  at 42 °C are the F-ATPase  
316 subunit c (AtpE) and Lmo2685, a component of the phosphotransferase system (PTS).  
317 Yet, we identified no protein which is upregulated in  $\Delta clpP1$  and  $\Delta clpP1/2$ , but not in  
318  $\Delta clpP2$  at both temperatures. Since ClpX and most likely other chaperones bind solely  
319 to ClpP2 (Gatsogiannis et al., 2019), a deletion of ClpP1 is expected to solely adjust  
320 the speed of substrate degradation with little impact on the substrate scope itself. Thus,  
321 static proteome analysis may not capture the dynamics of protein digest, as during cell  
322 harvest and lysis ClpP2 still retains its activity, which could diminish observed  
323 proteome changes between  $\Delta clpP1$  and the wild type.

324  
325 For  $\Delta clpP2$  and  $\Delta clpP1/2$ , again many more proteins are dysregulated (Figure 6b,c),  
326 with 375 and 366 upregulated proteins for either deletion mutant. 216 proteins are  
327 downregulated in  $\Delta clpP2$  and 156 proteins are downregulated in  $\Delta clpP1/2$ . Yet, there  
328 is still a high overlap between dysregulated proteins of  $\Delta clpP2$  and  $\Delta clpP1/2$ . 86% of  
329 proteins upregulated in  $\Delta clpP1/2$  are also upregulated in  $\Delta clpP2$  and the same applies  
330 to 65 % of downregulated proteins of  $\Delta clpP1/2$  (Figure 6d,e). Again a notable difference  
331 is the downregulation of 112 proteins in  $\Delta clpP2$ , which are not affected in  $\Delta clpP1/2$ . In  
332 line with whole proteomes at 37 °C, both deletion mutants show an upregulation of  
333 iron- or iron-sulfur-containing proteins and class III heat shock proteins. Interestingly,  
334 for  $\Delta clpP2$  at 42 °C we could identify SOS-related GOBP terms (e.g. DNA repair, base-  
335 excision repair, cellular response to DNA damage stimulus) to be upregulated, which  
336 distinguishes it from the same deletion mutant at 37 °C (Table S7, S8). Yet, the actual  
337 term “SOS response” is only significantly upregulated for  $\Delta clpP1/2$  at 42 °C, further  
338 supporting the effect of both ClpPs on the SOS response regulation.

339 In addition, the pyrimidine and especially the UMP de novo biosynthesis is highly  
340 downregulated for  $\Delta clpP2$  and  $\Delta clpP1/2$  at both temperatures (Table S9, S10). This  
341 downregulation is especially pronounced at 42 °C with nearly every protein of the *pyr*  
342 operon affected. Recently, a downregulation of the UMP biosynthesis was also  
343 discovered for  $\Delta clpP$  of *S. aureus*, which was subsequently confirmed on the  
344 metabolite level (Kirsch et al., 2021). In contrast, the purine biosynthesis is not heavily  
345 affected in *L. monocytogenes*, which differs from the *S. aureus*  $\Delta clpP$  proteome.  
346 There are also some notable differences to the 37 °C whole proteomes. A majority of  
347 arginine biosynthetic proteins (ArgB, ArgC, ArgD, ArgF, ArgG, ArgH) is upregulated  
348 only at 42 °C both for  $\Delta clpP2$  and  $\Delta clpP1/2$ , together with their repressor ArgR.

349

### 350 Co-immunoprecipitation of ClpP1 and ClpP2

351 In order to identify specific interaction partners of ClpP1 and ClpP2, we conducted co-  
352 immunoprecipitation (co-IP) experiments. The  $\Delta clpP1$  and  $\Delta clpP2$  mutants were grown  
353 to stationary phase at 37 °C and 42 °C, respectively, and interacting proteins were  
354 covalently crosslinked with DSSO (XL-co-IP). The ClpPs were precipitated with a  
355 polyclonal anti-ClpP antibody and binding partners of each ClpP isoform were  
356 selectively pulled down. The precipitated proteins were digested with trypsin and  
357 analyzed by LC-MS/MS.

358

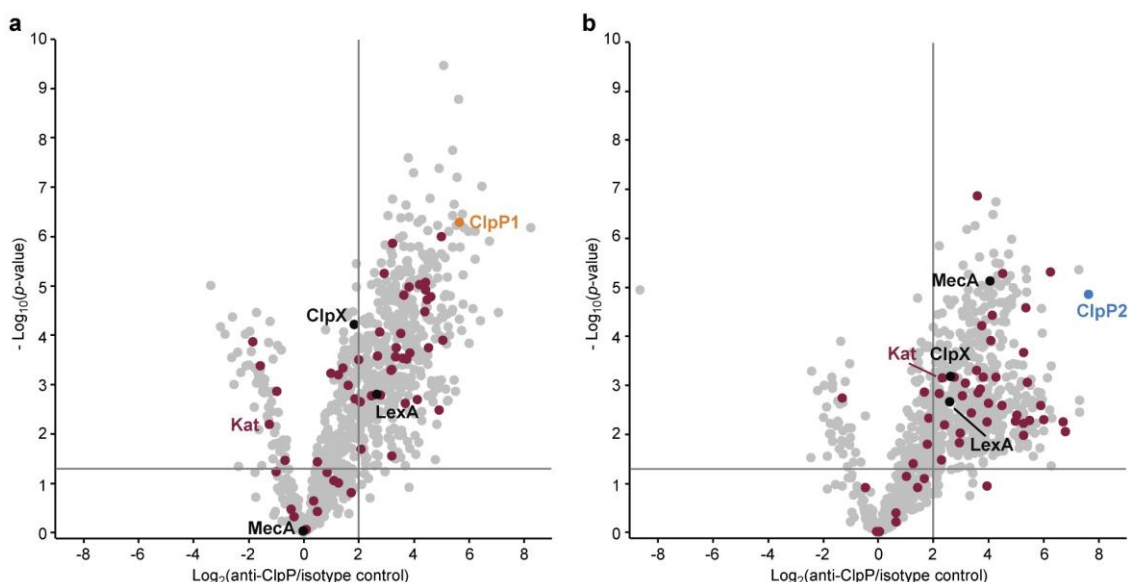

359

360 **Figure 7 Co-immunoprecipitation of ClpP1 and ClpP2 in *L. monocytogenes*  $\Delta clpP$  mutants.** a, b  
361 Volcano plots of co-IPs with anti-ClpP antibody in *L. monocytogenes*  $\Delta clpP2$  (a) and  $\Delta clpP1$  (b)  
362 at stationary phase (37 °C).  $-\log_{10} p$ -values from two-sample Student's *t*-test are plotted against  $\log_2$   
363 ratios of LFQ protein intensities. The vertical grey lines show 4-fold enrichment, the horizontal grey lines

364 show  $-\log_{10}$  t-test  $p$ -value = 1.3 ( $n = 4$ ). Oxidoreductases are highlighted with purple. ClpP1 and ClpP2  
365 are shown in orange and blue respectively.

366  
367

368 451 significantly enriched proteins were found for ClpP1 and 468 for ClpP2 at 37 °C  
369 as well as 232 and 145 at 42 °C, respectively (Figure 7). Overall, the co-IP results can  
370 be classified into two categories of proteins: a) chaperones and adaptor proteins that  
371 engage in a classical protein-protein interaction with ClpP and b) protein substrates  
372 that are bound to the chaperones and adaptors and are subsequently digested by  
373 ClpP. As it is not possible to assign hit proteins to one of these groups solely by the  
374 co-IP data, more in-depth analysis is required.

375 In case of *clpP* deletion, substrates are expected to accumulate. In order to decipher  
376 these putative substrates, we searched for common hits between upregulated proteins  
377 in  $\Delta clpP$  strains and the co-IPs (Figure 8a). Vice versa, proteins that were only enriched  
378 in the co-IP and not in the  $\Delta clpP$  strains were regarded as putative interaction partners.  
379 We first evaluated the 37 °C results and then compared these with the 42 °C datasets.

380

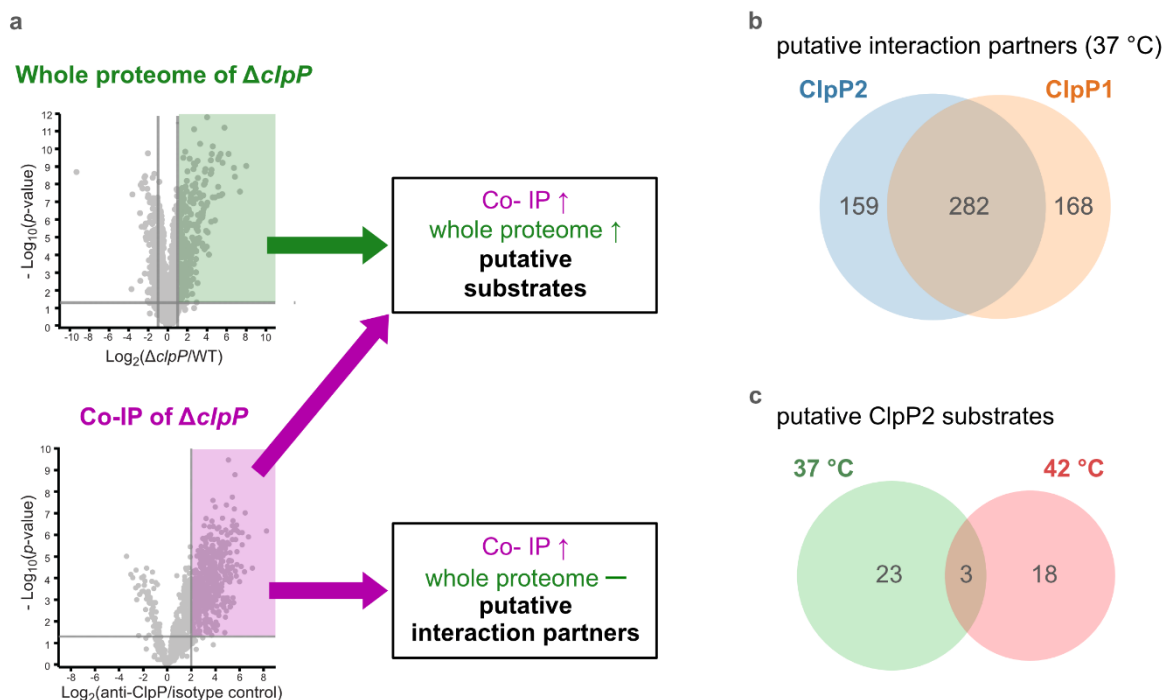

381  
382 **Figure 8 Proteomic analysis of the cellular functions of the ClpP isoforms and identification of**  
383 **putative substrates.** **a** Proteins were classified as putative ClpP substrates (see table 1) if they were  
384 significantly enriched both in the whole-proteome analysis at 37 °C and/or 42 °C and in the anti-SaClpP  
385 co-IP of the respective  $\Delta clpP$  mutants at the same temperature. Proteins that were significantly enriched  
386 only in the co-IP were classified as putative interaction partners of ClpP (Table S11, S12). **b** Venn-  
387 diagram showing the putative interaction partners of ClpP1 and ClpP2 at 37 °C. **c** Venn-diagram  
388 showing the putative substrates of ClpP2 at both temperatures.

389

390 Most of the putative interaction partners at 37 °C are common for both proteases  
391 (Figure 8b, Table S11). In general, many cellular metabolic terms, including amino acid  
392 and nucleobase-related metabolism, are upregulated in this protein group, suggesting  
393 an important role of ClpP in the general cellular metabolism.

394 ClpX was identified as a specific interaction partner of solely ClpP2 which is  
395 corroborated by previous structural and activity data demonstrating that ClpP1 lacks  
396 the hydrophobic binding pockets needed for association with chaperones (Dahmen et  
397 al., 2015; Gatsogiannis et al., 2019). The large number of putative interactors (450 for  
398 ClpP1 and 441 for ClpP2) emphasizes that also unspecific binders are among these  
399 proteins.

400 Applying the search criteria (enriched in XL-co-IP as well as in the corresponding  
401 deletion strain) we identified 26 putative ClpP2 substrate proteins at 37 °C (Table 1).  
402 Among these, analogs of four proteins (MecA, LexA, MurC and catalase) are known  
403 ClpP substrates (Feng et al., 2013; Flynn et al., 2003).

404

405 **Table 1 List of putative ClpP2 substrates.** \*The functions of not annotated proteins  
406 were derived from BLAST searches.

407

| Gene                                | Uniprot ID | Description                                                           |
|-------------------------------------|------------|-----------------------------------------------------------------------|
| <b>Putative substrates at 37 °C</b> |            |                                                                       |
| lmo0485                             | Q8Y9P0     | Putative oxidoreductase, iron response*                               |
| lmo0487                             | Q8Y9N8     | Putative hydrolase*                                                   |
| lmo0582 ( <i>iap</i> )              | P21171     | Invasion-associated protein p60                                       |
| lmo0640                             | Q8Y993     | Putative oxidoreductase*                                              |
| lmo0823                             | Q8Y8S1     | Putative oxidoreductase*                                              |
| lmo0930                             | Q8Y8H4     | Putative lactamase*                                                   |
| lmo1320 ( <i>polC</i> )             | Q8Y7G1     | PolC-type DNA polymerase III                                          |
| lmo1350 ( <i>gcvPB</i> )            | Q8Y7D3     | Probable glycine dehydrogenase (decarboxylating) subunit 2            |
| lmo1381 ( <i>acyP</i> )             | Q8Y7A7     | Acylphosphatase (pyruvate metabolism)                                 |
| lmo1406 ( <i>pflB</i> )             | Q8Y786     | Pyruvate formate-lyase (pyruvate metabolism)                          |
| lmo1515                             | Q8Y711     | Similar to CymR cystein metabolism repressor*                         |
| lmo1538 ( <i>glpK</i> )             | Q8Y6Z2     | Glycerol kinase (glycerol metabolism)                                 |
| lmo1605 ( <i>murC</i> )             | Q8Y6S8     | UDP-N-acetylmuramate-L-alanine ligase                                 |
| lmo1921                             | Q8Y5Y2     | Unknown function                                                      |
| lmo1932                             | Q8Y5X2     | Putative heptaprenyl diphosphate synthase (menaquinone biosynthesis)* |



**Table 1** continued

| Gene                                            | Uniprot ID | Description                                                            |
|-------------------------------------------------|------------|------------------------------------------------------------------------|
| Imo2168                                         | Q8Y5A1     | Putative lactoylglutathione lyase*                                     |
| Imo2190 ( <i>mecA</i> )                         | Q9RGW9     | ClpC adapter protein MecA                                              |
| Imo2205 ( <i>gpmA</i> )                         | Q8Y571     | 2,3-Bisphosphoglycerate-dependent phosphoglycerate mutase (glycolysis) |
| Imo2743 ( <i>tal1</i> )                         | Q8Y3T8     | Probable transaldolase 1 (pentose phosphate pathway)                   |
| Imo2755                                         | Q8Y3S6     | Putative dipeptidyl-peptidase activity*                                |
| Imo2759                                         | Q8Y3S3     | Macro domain-containing protein (putative ADP-ribose binding)          |
| Imo2785 ( <i>kat</i> )                          | Q8Y3P9     | Catalase (H <sub>2</sub> O <sub>2</sub> detoxification)                |
| Imo2829                                         | Q8Y3K6     | Putative nitroreductase*                                               |
| <b>Putative substrates at both temperatures</b> |            |                                                                        |
| Imo1302 ( <i>lexA</i> )                         | Q8Y7H7     | LexA SOS response repressor                                            |
| Imo2182                                         | Q8Y587     | Putative ferrichrome ABC transporter ATP-binding protein*              |
| Imo2526 ( <i>murA</i> )                         | Q8Y4C4     | UDP-N-acetylglucosamine 1-carboxyvinyltransferase 1                    |
| <b>Putative substrates at 42 °C</b>             |            |                                                                        |
| Imo0227                                         | Q8YAB9     | tRNA-dihydrouridine synthase                                           |
| Imo0229 ( <i>ctsR</i> )                         | Q7AP89     | CtsR (transcription repressor of class III heat shock genes)           |
| Imo0231 ( <i>mcsB</i> )                         | Q48759     | Arginine Kinase McsB                                                   |
| Imo0454                                         | Q8Y9R9     | Putative MoxR family ATPase*                                           |
| Imo0608                                         | Q8Y9C4     | Putative multidrug ABC transporter *                                   |
| Imo0785                                         | Q8Y8V7     | Transcriptional Regulator ManR                                         |
| Imo1293 ( <i>glpD</i> )                         | Q8Y7I4     | Glycerol-3-phosphate dehydrogenase                                     |
| Imo1387                                         | Q8Y7A2     | Putative pyrrolysine-5-carboxylate reductase*                          |
| Imo1475 ( <i>hrcA</i> )                         | P0DJM4     | HrcA (heat-inducible transcription repressor A)                        |
| Imo1631 ( <i>trpD</i> )                         | Q8Y6Q3     | Anthranilate phosphoribosyltransferase                                 |
| Imo1713 ( <i>mreB</i> )                         | Q8Y6H3     | Cell shape-determining protein MreB                                    |
| Imo1813                                         | Q8Y684     | L-serine deaminase                                                     |
| Imo1881                                         | Q8Y621     | Putative 5'-3'-exonuclease*                                            |
| Imo2267 ( <i>addA</i> )                         | Q8Y511     | ATP-dependent helicase/nuclease subunit A                              |
| Imo2352                                         | Q8Y4T0     | Putative LysR family transcriptional regulator*                        |
| Imo2489 ( <i>uvrB</i> )                         | Q8Y4F5     | UvrABC system protein B, excision nuclease                             |
| Imo2552 ( <i>murZ</i> )                         | Q8Y4A2     | UDP-N-acetylglucosamine 1-carboxyvinyltransferase 2                    |
| Imo2712                                         | Q8Y3W7     | Putative gluconate kinase (Pentose phosphate pathway)*                 |

409 Six of the 26 classified substrates are oxidoreductases and four other proteins are  
410 associated with oxidative stress (LexA, Lmo1515 CymR analog, Lmo2168 putative  
411 lactoylglutathione lyase and Lmo2182 ferrichrome ABC transporter) suggesting that  
412 ClpP plays a crucial role in redox homeostasis in *L. monocytogenes*, similar to  
413 *S. aureus* ClpP (Farrand et al., 2015; Michel et al., 2006). For example, LexA, the  
414 repressor of the SOS regulon, is a known ClpP target in *E. coli* and in *S. aureus* (Cohn  
415 et al., 2011; Flynn et al., 2003). During the activation of the SOS response, LexA  
416 undergoes autocleavage and the N- and C-terminal domains are separated (Michel,  
417 2005). Consequently, the ClpX recognition sequence gets exposed and NTD (in some  
418 organisms also the CTD) is degraded by ClpXP (Cohn et al., 2011). While we were  
419 unable to detect any peptides that stretch across the autocleavage site, the fact that  
420 many SOS response proteins were upregulated in both  $\Delta clpP2$  and  $\Delta clpP1/2$  suggests  
421 that cleaved LexA accumulates, which can only weakly bind to the SOS box.

422 Interestingly, the number of overall and enriched proteins identified via XL-co-IP largely  
423 dropped at 42 °C (Figure S5, Table S12). Of the putative interaction partners the  
424 majority was identified for ClpP1 (123 for ClpP2 and 230 for ClpP1) and fewer were  
425 mutual for both isoforms (Figure S5c). A large fraction in this protein group again falls  
426 into general metabolic pathways. Yet, some minor differences such as DNA replication  
427 being overrepresented are notable.

428 In search for ClpP2 substrates at this temperature, we identified 21 putative proteins  
429 (Table 1). Interestingly, only three of those proteins are also substrate candidates at  
430 37 °C (LexA, MurA, Lmo2182 ferrichrome ABC transporter) with 18 additional proteins  
431 being substrate candidates solely at 42 °C (Figure 8c). This indicates that the substrate  
432 scope is adapted with changing conditions like temperature. There are five additional  
433 proteins among those that have been previously described as ClpP substrates in other  
434 bacteria, namely the two heat transcriptional regulators HrcA and CtsR, ClpC adaptor  
435 protein McsB, DNA damage repair protein UvrB and glycerol-3-phosphate  
436 dehydrogenase GlpD (Feng et al., 2013; Flynn et al., 2003). HrcA and CtsR regulate  
437 the expression of class I and III heat shock proteins, while UvrB is an integral part of  
438 the SOS response (Kisker et al., 2013; Nair et al., 2000; Schulz & Schumann, 1996;  
439 van der Veen et al., 2010) . In addition, we identified AddAB helicase/nuclease  
440 subunit A as putative ClpP2 substrate, which is also an SOS response protein (van der  
441 Veen et al., 2010). Other identified putative substrates at 42 °C are involved in cell wall  
442 synthesis, cell shape (MurA, MurZ, MreB) and metabolic processes (e.g. GlpD,

443 Lmo1387 pyrrolysyl-5-carboxylate reductase, TrpD, Lmo1813 L-serine deaminase,  
444 Lmo2712 gluconate kinase). Thus, in summary 44 putative ClpP2 substrates were  
445 identified in this work. At both temperatures, nearly no putative ClpP1 substrates could  
446 be identified with this approach in our datasets (except for FhuC at 42 °C). This lack of  
447 substrates was expected as ClpP1 is only active in complex with ClpP2.

448 With many identified dysregulated proteins and putative substrates being related to  
449 oxidative stress, we finally investigated the ability of the  $\Delta clpP$  mutants to grow in  
450 medium supplemented with H<sub>2</sub>O<sub>2</sub> (Figure 9). Surprisingly, only  $\Delta clpP1/2$  could grow in  
451 the presence of 100 ppm H<sub>2</sub>O<sub>2</sub>. This is in line with the observation that SOS-related  
452 GOBP terms were significantly upregulated only in  $\Delta clpP1/2$  but not in  $\Delta clpP2$  and  
453  $\Delta clpP1$  at 37 °C. Thus, this indicates that a constitutively upregulated SOS response  
454 system readily protects cells from H<sub>2</sub>O<sub>2</sub> in the  $\Delta clpP1/2$  strain.

455

456

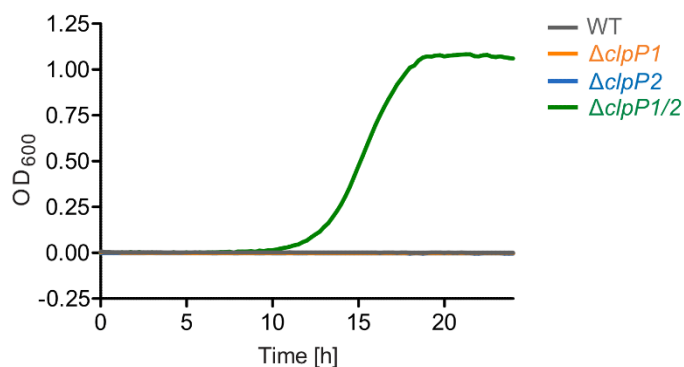

457

458 **Figure 9 *L. monocytogenes*  $\Delta clpP1/2$  is resistant against oxidative stress.** Growth curves of the  
459  $\Delta clpP$  mutants in the presence of 100 ppm H<sub>2</sub>O<sub>2</sub> (BHI medium, 37 °C). Note that the WT strain and the  
460 single *clpP* knockouts show no growth under these conditions. Means of triplicates are shown. The  
461 experiment was independently repeated with qualitatively identical results (data not shown).

462

463

## 464 Discussion

465

466 ClpP is a conserved heat shock protein in bacteria and in eukaryotic organelles. Some  
467 organisms have more than one *clpP* gene, but the role of multiple ClpPs in these  
468 organisms is not well understood. In bacteria, it is known that two different ClpPs are  
469 able to form heterocomplexes to become active, tune the cleavage specificity or  
470 enhance the activity of the homocomplexes (Dahmen et al., 2015; Li et al., 2016;  
471 Mawla et al., 2020; Pan et al., 2019). Here we examined the biological role of ClpP1/2

472 heterocomplex formation in *L. monocytogenes* and the specific physiological functions  
473 of both ClpPs.

474 We showed that ClpP1 and ClpP2 do not bind to each other at 10 °C, and under these  
475 conditions ClpP2 is a homotetradecamer and ClpP1 an inactive heptamer. At high  
476 temperatures, especially above 37 °C, the ClpP1/2 heterocomplex is formed displaying  
477 enhanced substrate turnover. We suspected that this trait is important for modulation  
478 of ClpP proteolytic activity and is therefore crucial for stress response and virulence  
479 regulation. In order to study this effect in intact *L. monocytogenes* cells, we performed  
480 MS-based co-IP experiments at various temperatures. We observed enhanced ClpP1  
481 binding to the bait ClpP2 at 42 °C as compared to 20 °C, which indeed indicates that  
482 temperature affects intracellular heterooligomer formation. However, the analysis of  
483 ClpP1 as bait was challenged due to its low abundance at 20 °C. Thus, further research  
484 is needed to investigate the exact conditions under which heterooligomerization takes  
485 place *in situ* and elucidate whether other factors such as binding partners or post-  
486 translational modifications can modulate ClpP1/2 complex formation.

487 With the aim of dissecting the physiological functions of each ClpP isoforms, we  
488 constructed single and double *clpP* deletion mutants in *L. monocytogenes* EGD-e.  
489 Phenotypic assays showed decreased growth of  $\Delta clpP1/2$  in culture medium and in  
490 macrophages. MS-based whole proteome analysis demonstrated that the deletion of  
491 *clpP1* only caused minimal changes in the proteome while  $\Delta clpP2$  and  $\Delta clpP1/2$   
492 mutants differed greatly from the wild type. These results highlight the predominant  
493 role of ClpP1 as an enhancer of catalytic turnover which is unable to process  
494 substrates by itself. In  $\Delta clpP2$  and  $\Delta clpP1/2$  mutants, class III heat shock proteins and  
495 a subset of the SOS response proteins as well as iron-containing proteins were  
496 upregulated. These results suggest that ClpP plays an important role in the regulation  
497 of oxidative stress response, which is in line with the results of transcriptomic analysis  
498 of the *S. aureus*  $\Delta clpP$  mutant (Michel et al., 2006). Furthermore, the upregulated SOS  
499 response predominantly observed in the  $\Delta clpP1/2$  mutant led to a strong H<sub>2</sub>O<sub>2</sub>  
500 resistance for this strain.

501 We conducted co-IPs in the single mutants with anti-ClpP antibody in order to identify  
502 specific ClpP1 and ClpP2 substrates and interaction partners. Combined analysis of  
503 the co-IP and whole proteome data at two temperatures led to the identification of 44  
504 putative ClpP2 substrates and ~700 putative ClpP1 and ClpP2 interaction partners. To  
505 a large extent the putative interaction partners are shared between ClpP1 and ClpP2

506 and many of them are involved in the general cellular metabolism, including amino acid  
507 and nucleic acid metabolism. ClpP might have an indirect effect on proteostasis via the  
508 interactions with these proteins. A large fraction of the identified ClpP2 substrates are  
509 related to transcriptional regulation, cell wall synthesis, cellular metabolism and  
510 oxidative stress, including LexA, corroborating the upregulation of SOS response  
511 proteins in the whole proteome.

512 In summary, we found that the ClpP1/2 heterocomplex in *L. monocytogenes* acts as a  
513 thermometer which assembles at elevated temperatures and revealed ClpP's role in  
514 coping with heat-induced stress. Studying ClpP heterocomplex formation in other  
515 organisms under varying conditions might reveal that thermosensitivity is a general  
516 feature of ClpPs in bacteria carrying more than one *clpP* genes. This study and initial  
517 data from *M. tuberculosis* (Leodolter et al., 2015), showing a temperature-dependent,  
518 reversible assembly of a ClpP1/2 heterocomplex without an activator peptide, point in  
519 this direction.

520

## 521 **Competing Interests**

522 The authors declare no competing financial interests.

523

## 524 **Acknowledgements**

525 This work was performed within the framework of SFB 1035 (German Research  
526 Foundation DFG, Sonderforschungsbereich 1035, Projektnummer 201302640, project  
527 A09). We thank Mona Wolff and Katja Bäuml for technical support as well as Dr. Stuart  
528 Ruddell for critical proofreading of the manuscript. We are grateful to Prof. Dr. Thilo M.  
529 Fuchs and Dr. Jakob Schardt for their help with cloning in *L. monocytogenes*. We thank  
530 Dr. David Lyon (UZH, Institute of Molecular Life Sciences, Switzerland) for support  
531 concerning the aGOtool.

532

## 533 **Methods**

534

### 535 **Protein overexpression and purification**

536 ClpP2 was obtained as described previously (Zeiler et al., 2013). In short, expression  
537 constructs with C-terminal Strep-tag II were cloned in pET301 plasmids, over-  
538 expressed in *E. coli* BL21(DE3) and purified by affinity chromatography and gel  
539 filtration. ClpP1 was kindly provided by Dr. Maria Dahmen (Dahmen et al., 2015). Co-

540 expressed ClpP1/2 was obtained as described previously (Gatsogiannis et al., 2019).  
541 Creatine kinase (10 127 566 001) was purchased from Roche (Roche Diagnostics  
542 GmbH, Mannheim, Germany).

543

#### 544 **Analytical size-exclusion chromatography followed by intact protein mass** 545 **spectrometry**

546 544 nmol ClpP1<sub>7</sub> (1:1 ClpP1:ClpP2 monomeric ratio) and/or 272 nmol ClpP2<sub>14</sub> were  
547 incubated for 30 min at the indicated temperatures (0 – 48 °C) in ClpP-GF buffer (20  
548 mM MOPS, 100 mM KCl, 5% glycerol, pH 7.0) in a final volume of 100 µL. The samples  
549 were loaded on a pre-equilibrated Superdex 200 10/300 gel filtration column (GE  
550 Healthcare, Chicago, United States) connected to an ÄKTA Purifier 10 system (GE  
551 Healthcare) and eluted with 1 CV ClpP-GF buffer. 200 µL fractions were collected. UV  
552 absorption was recorded at 280 nm. The oligomerization state was determined by  
553 comparison of the elution volumes to the calibration curve of the column (Gel Filtration  
554 Calibration Kit, GE Healthcare). The fraction corresponding to the tetradecamer peak  
555 was analyzed by intact protein mass spectrometry. Measurements were carried out on  
556 a Dionex Ultimate 3000 HPLC system (Thermo Fisher Scientific, Waltham, United  
557 States) coupled to a Thermo LTQ-FT Ultra mass-spectrometer (Thermo Fisher  
558 Scientific) with electrospray ionisation source (spray voltage 4.0 kV, tube lens 110 V,  
559 capillary voltage 48 V, sheath gas 60 a.u., aux gas 10 a.u., sweep gas 0.2 a.u.). 5 µL  
560 were desalted with a MassPREP desalting cartridge (Waters, Milford, United States).  
561 The mass spectrometer was operated in positive mode collecting full scans at high  
562 resolution (R =200 000) from m/z =600 to m/z =2000. Collected data was deconvoluted  
563 using the Thermo Xcalibur Xtract algorithm (Thermo Fisher Scientific).

564 The experiments with a mixture of ClpP1<sub>7</sub> and ClpP2<sub>14</sub> at 20 °C and at 42 °C were  
565 repeated with qualitatively identical results. Plots were made with Microcal OriginPro  
566 2018 (OriginLab Corporation, Northampton, United States).

567

#### 568 **Protease assay**

569 Protease assays were carried out in flat bottom black 96-well plates in a final volume  
570 of 60 µL. 0.1 µM ClpP2<sub>14</sub> or a mixture of 0.2 µM ClpP1<sub>7</sub> and 0.1 µM ClpP2<sub>14</sub> (1:1  
571 ClpP1:ClpP2 monomeric ratio), ClpX<sub>6</sub> (0.4 µM) and ATP regeneration mix (4 mM ATP,  
572 16 mM creatine phosphate, 20 U/mL creatine kinase) were pre-incubated for 30 min at  
573 the indicated temperatures (30 °C, 37 °C and 42 °C) in PZ buffer (25 mM HEPES,

574 200 mM KCl, 5 mM MgCl<sub>2</sub>, 1 mM DTT, 10% glycerol, pH 7.6). 0.4 μM eGFP-LmSsrA  
575 substrate was added and fluorescence ( $\lambda_{\text{ex}} = 485 \text{ nm}$ ,  $\lambda_{\text{em}} = 535 \text{ nm}$ ) was measured at  
576 the respective temperatures with an infinite M200Pro plate reader (Tecan, Männedorf,  
577 Switzerland). Data were recorded in triplicates. The measurements were  
578 independently repeated with qualitatively identical results. Protease activity was  
579 determined by linear regression using Microsoft Excel and plots were made with  
580 GraphPad Prism 6 (GraphPad, San Diego, United States).

581

## 582 **Cloning of *L. monocytogenes* mutants**

### 583 **Generation of *L. monocytogenes* *clpP1(191)::2xmyc* and *L. monocytogenes*** 584 ***clpP2(199)::2xmyc***

585 *Construction of pLSV101\_clpP-2xmyc shuttle vectors* Ca. 1000 base pairs upstream  
586 and downstream from the C-terminus of *clpP1* were amplified by PCR using the A–B  
587 and C–D primer pairs from Table 2 (Phusion polymerase, GC buffer, New England  
588 Biolabs, Ipswich, United States). For *clpP2*, ca. 700 bp upstream and downstream  
589 were amplified using the A–B and C–CD primer pairs from Table 2 (Phusion  
590 polymerase, GC buffer, New England Biolabs). The 2xmyc tag was added to the B  
591 primers as overhangs. The PCR products were purified with E.Z.N.A. Cycle Pure Kit  
592 (Omega Bio-tek, Norcross, United States). The AB fragments were digested with Sall-  
593 HF (New England Biolabs) and BglII (Promega, Madison, United States), the CD  
594 fragments were digested with BglII (Promega) and BamHI (New England Biolabs) and  
595 the empty pLSV101 vector was digested with Sall-HF and BamHI-HF (New England  
596 Biolabs). The digested DNAs were purified with E.Z.N.A. Gel Extraction Kit (Omega  
597 Bio-tek) after agarose gel electrophoresis. The AB and CD fragments were ligated with  
598 T4 DNA ligase (New England Biolabs) (1:1 molar ratio, 15 °C, overnight). The ligated  
599 fragments were amplified by PCR (Phusion polymerase, HF buffer, New England  
600 Biolabs) using the *clpP1\_A-clpP1D* and *clpP2\_A-clpP2\_CD* primer pairs (Table 2).  
601 The PCR products were purified with E.Z.N.A. Gel Extraction Kit (Omega Bio-tek) after  
602 agarose gel electrophoresis. The ABCD fragments were digested with Sall-HF and  
603 BamHI-HF (New England Biolabs) and dephosphorylated with Antarctic phosphatase  
604 (New England Biolabs). The fragments were purified with E.Z.N.A. Gel Extraction Kit  
605 (Omega Bio-tek) after agarose gel electrophoresis. The fragments were ligated into  
606 the pLSV101 vector (1:1 and 3:1 molar ratios) with T4 DNA ligase (New England  
607 Biolabs) (10 °C for 30 s and 30 °C for 30 s alternating overnight). The ligated vectors

608 were transformed into chemically competent *E. coli* TOP10. *E. coli* containing pLSV101  
609 was grown with 200 µg/mL erythromycin. Colonies were tested with colony PCR using  
610 pLSV101\_seq fwd and rev primers (Table 2). The vectors were purified from positive  
611 colonies with NucleoSpin Plasmid EasyPure, Mini kit (MACHEREY-NAGEL, Düren,  
612 Germany) (elution with ddH<sub>2</sub>O) and sequenced by Sanger sequencing with A and D  
613 primers.

614  
615 *Preparation of electrocompetent L. monocytogenes* 200 mL BHI medium (7.5 g/L brain  
616 infusion, 1 g/L peptone, 10 g/L heart infusion, 5 g/L NaCl, 2.5 g/L Na<sub>2</sub>HPO<sub>4</sub>, 2 g/L  
617 glucose, pH 7.4) was inoculated to an initial OD<sub>600</sub> of 0.05 with an overnight culture of  
618 *L. monocytogenes* EGD-e. The culture was grown to OD<sub>600</sub> = 0.5 at 37 °C, 200 rpm.  
619 5 µg/mL penicillin G was added, and the bacteria were incubated at 37 °C, 200 rpm for  
620 15 min and on ice without shaking for 10 min. The cells were harvested (4000 g, 10  
621 min, 4 °C) and washed with 30 mL ice-cold SMHEM medium (952 mM saccharose, 3.5  
622 mM MgCl<sub>2</sub>, 7 mM HEPES, pH 7.2). The pellet was resuspended in 2 mL cold SMHEM  
623 medium. 100 µL aliquots were prepared and shock-frozen in liquid N<sub>2</sub> and stored at  
624 -80 °C.

625  
626 *Transformation into L. monocytogenes* Electrocompetent *L. monocytogenes* EGD-e  
627 aliquots were thawed on ice and 1 µg plasmid was added. The cells were transferred  
628 into ice-cold 2 mm electroporation cuvettes (Bio-Rad, Hercules, United States) and  
629 electroporated (2500 V, 200 Ω, 25 µF, exponential decay, time constant < 4 ms) using  
630 Gene Pulser Xcell (Bio-Rad). 1 mL BHI medium + 0.5 mM saccharose was added and  
631 the cells were incubated at 30 °C for 4 h and plated on BHI agar plates containing 10  
632 µg/mL erythromycin. The plates were incubated at 30 °C for 3 days.

633  
634 **Table 2** List of primers used for the genomic insertion of 2xmyc tag into *L.*  
635 *monocytogenes*.

| Primer      | Sequence (5'→3')                                                                                  |
|-------------|---------------------------------------------------------------------------------------------------|
| clpP1_A     | GTTGCAGTCGACAGGAGGAAACCATGCAAGAG                                                                  |
| clpP1-Myc_B | TTAGATCTAAATCTTCTTCACTAATTAATTTTTGTTC<br>TAAATCTTCTTCACTAATTAATTTTTGTTCCTTTAAG<br>CCATCGCGATTTTCG |



|                 |                                                                                                     |
|-----------------|-----------------------------------------------------------------------------------------------------|
| clpP1_C         | CGGCAGATCTATAAAACCAAAGGTTCACTTC                                                                     |
| clpP1_D         | CTTTATGGATCCTTGATCCGGTCACTCCAG                                                                      |
| clpP2_A         | GTTGCAGTCGACACAGGAGGAATCTTGATATGAAC                                                                 |
| clpP2-Myc_B     | TTAGATCTAAATCTTCTTCACTAATTAATTTTTGTTC<br>TAAATCTTCTTCACTAATTAATTTTTGTTCGCCTTT<br>AAGCCAGATTTATTAATG |
| clpP2_C         | CGGCAGATCTCTAATAAAAAAGAGGTTTTGCAC                                                                   |
| clpP2_CD        | CTTTATGGATCCTTCTGCAGTTCTAACAGGAGT                                                                   |
| pLSV101_seq fwd | AGTACCATTACTTATGAG                                                                                  |
| pLSV101_seq rev | AGGGTTTTCCCAGTCACG                                                                                  |
| clpP1_tag fwd   | CGTAATTTCTGGCTTTCTG                                                                                 |
| clpP1_tag rev   | GAGTGATAAATGAATTAGGTCAAG                                                                            |
| clpP2_tag fwd   | GCGATACAGATCGTGATAATTTTC                                                                            |
| clpP2_tag rev   | GAATACTAGTGTATACATTCTATGGAAG                                                                        |

---

636

637 *Homologous recombination and colony selection* 2.5 mL BHI medium with 10 µg/mL  
638 erythromycin was inoculated with single colonies after transformation. 10<sup>-2</sup> and 10<sup>-6</sup>  
639 dilutions were plated on BHI + 10 µg/mL erythromycin agar plates and incubated at  
640 42 °C for 2 days. Colony PCR (OneTaq polymerase, New England Biolabs) with the  
641 respective primer pairs clp\_A–pLSV101\_seq rev and pLSV101\_seq fwd–clp\_D (Table  
642 2) was performed to check the genomic integration of the fragments. Positive colonies  
643 were subcultivated several times in 3 mL BHI medium without antibiotic at 30 °C (200  
644 rpm). 10<sup>-6</sup> dilutions were plated on BHI agar plates (37 °C, overnight). Single colonies  
645 were picked and transferred to BHI agar plates with and without 10 µg/mL erythromycin  
646 (37 °C, overnight). Erythromycin-sensitive strains were tested with colony PCR  
647 (OneTaq DNA polymerase, New England Biolabs) using the clpP\_tag fwd and rev  
648 primer pair (Table 2) to check for integration of the 2xmyc tag into the genome.

649

### 650 **Generation of *L. monocytogenes* Δ*clpP1***

651 *Construction of pMAD\_Δ*clpP1* shuttle vector* A pMAD shuttle vector derivative was  
652 used to introduce a deletion of *clpP1* (Arnaud et al., 2004). Approx. 1000 bp upstream  
653 (clpP1\_KO\_A and clpP1\_KO\_B, Table 3) region of *clpP1* was amplified by PCR (GC  
654 buffer, Phusion polymerase, New England Biolabs) using isolated *L. monocytogenes*

655 EGD-e DNA as template. The PCR product was purified (Cycle Pure Kit, E.Z.N.A.,  
656 Omega Bio-tek) and digested with MluI and NcoI (Promega, standard protocol). pMAD  
657 plasmid was also digested with MluI and NcoI and dephosphorylated by addition of  
658 TSAP (Promega, streamlined restriction digestion protocol) for 20 min. After restriction  
659 digest products were purified (MicroElute DNA Clean-Up Kit, E.Z.N.A., Omega Bio-  
660 tek). Ligation into pMAD vector was conducted using T4 DNA Ligase (Promega,  
661 standard protocol) overnight at 8 °C and a vector:insert ratio of 1:6. The ligation product  
662 (pMAD-AB) was chemically transformed into *E. coli* TOP10 cells and plated onto LB  
663 agar containing ampicillin. Accordingly, a 1000 bp downstream (clpP1\_KO\_C and  
664 clpP1\_KO\_D, Table 3) region of clpP1 was amplified by PCR (GC buffer, Phusion  
665 polymerase, New England Biolabs) using isolated *L. monocytogenes* EGD-e DNA as  
666 template. The PCR product was purified (Cycle Pure Kit, E.Z.N.A., Omega Bio-tek)  
667 and digested with MluI and BamHI (Promega, standard protocol). pMAD-AB plasmid  
668 was also digested with MluI and BamHI and dephosphorylated by addition of TSAP  
669 (Promega, streamlined restriction digestion protocol) for 20 min. After restriction digest  
670 products were purified (MicroElute DNA Clean-Up Kit, E.Z.N.A., Omega Bio-tek).  
671 Ligation into pMAD-AB vector was conducted using T4 DNA Ligase (Promega,  
672 standard protocol) overnight at 8 °C and a vector:insert ratio of 1:6. Insertion of the  
673 desired construct was tested after plasmid extraction (Plasmid Mini Kit I, E.Z.N.A.,  
674 Omega Bio-tek) by analytical restriction digest and sequencing (pMAD-seq-for and  
675 pMAD-seq-rev, Table 3).

676

677 **Table 3** List of primers used for the construction *L. monocytogenes* *clpP* deletion  
678 mutants.

| Primer       | Sequence (5'→3')                                  |
|--------------|---------------------------------------------------|
| clpP1_KO_A   | GGACCATGGTTTCATCAGCAAACCTCCGCAC                   |
| clpP1_KO_B   | GGAACGCGTGAAAAAATTCCTCCTTAAAAAGCCTTAG<br>TTTATTTG |
| clpP1_KO_C   | GGAACGCGTAAGCAAAAGATTACGGCATCG                    |
| clpP1_KO_D   | GGAGGATCCTTGATCCGGTCACTCCAGTA                     |
| pMAD-seq-for | CCCAATATAATCATTATCAACTCTTTTACACTTAAAT<br>TTCC     |
| pMAD-seq-rev | GCAACGCGGGCATCCCGATG                              |

|            |                                    |
|------------|------------------------------------|
| clpP2_KO_A | CGAACAGTGTAAGTGTATGCG              |
| clpP2_KO_B | AGTTTGAGATCTTACTGTTGGAATTAAGTTCAT  |
| clpP2_KO_C | TACGGCAGATCTGATGATATTATCATTAAATAAA |
| clpP2_KO_D | TTGCATTTGTAGTGGTTATGG              |
| clpP2_AB   | GTTGCAGTCGACTCTAACGATGATCTTGTTAGT  |
| clpP2_CD   | CTTTATGGATCCTTCTGCAGTTCTAACAGGAGT  |

---

679

680 *Preparation of electrocompetent L. monocytogenes* 100 mL of BM medium (10 g/L  
681 soy peptone, 5 g/L yeast extract, 5 g/L NaCl, 1 g K<sub>2</sub>HPO<sub>4</sub> × 3 H<sub>2</sub>O, 1 g/L glucose, pH  
682 7.4–7.6) were inoculated with 1 mL (1:100) from a *L. monocytogenes* EGD-e overnight  
683 culture and incubated at 37 °C until an OD<sub>600</sub> of 0.5 was reached. Cells were  
684 centrifuged (5000 g, 15 min, 4 °C) and washed three times with cold 10% glycerol  
685 (sterile): 1.) 100 mL; 2.) 50 mL; 3.) 25 mL. The pellet was resuspended in 400 µL cold  
686 10% glycerol and 75 µL aliquots were frozen in liquid nitrogen and stored at –80 °C.

687

688 *Transformation into L. monocytogenes* Electrocompetent *L. monocytogenes* was  
689 thawed at room temperature (RT) and incubated for 10 min with > 1 µg plasmid. The  
690 suspension was transferred into a 0.1 cm electroporation cuvette (Bio-Rad) and  
691 electroporated (exponential, 25 µF, 1 kV, 400 Ω) using a Gene Pulser Xcell (Bio-Rad).  
692 Immediately after the pulse 1 mL pre-warmed BM medium was added and incubated  
693 at 30 °C for 90 min. The cell suspension was streaked onto BM agar containing  
694 selective antibiotic + X-gal and incubated until colonies were visible.

695

696 *Selection protocol – pMAD* After successful transformation into *L. monocytogenes*  
697 EGD-e, indicated by blue colonies, single colonies were picked and incubated  
698 overnight at 30 °C in the presence of 1 µg/mL erythromycin. 10 mL BM medium were  
699 inoculated 1:1000 from the overnight culture and incubated 2 h at 30 °C and 6 h at 42  
700 °C. 100 µL diluted cultures (10<sup>-2</sup> to 10<sup>-6</sup>) were plated onto BM agar (containing 1 µg/mL  
701 erythromycin and 100 µg/mL X-gal) and incubated at 42 °C until colonies with blue  
702 coloration were visible (enrichment of single crossover). Ten light blue colonies were  
703 picked and incubated (together) in 10 mL BM medium at 3 °C for 8 h followed by  
704 overnight incubation at 42 °C. 10 mL BM medium were inoculated 1:1000 from this  
705 overnight culture and grown for 4 h at 30 °C and additional 4 h at 42 °C. 100 µL of

706 diluted cultures ( $10^{-2}$  to  $10^{-6}$ ) were plated onto BM agar containing X-gal and incubated  
707 at 4 °C. White colonies were picked and streaked onto BM agar containing  
708 erythromycin and X-gal and onto BM agar containing only X-gal. Plates were incubated  
709 at 30 °C and erythromycin susceptible colonies further analyzed by colony PCR  
710 followed by analytical restriction digest and sequencing. For colony PCR small parts of  
711 colonies were resuspended in 50  $\mu$ L sterile water and 1  $\mu$ L thereof was used in PCR  
712 reactions with an initial denaturation step for 10 min (95 °C).

713

#### 714 **Generation of *L. monocytogenes* $\Delta clpP2$ and $\Delta clpP1/2$**

715 *Construction of pLSV101\_ $\Delta clpP2$  shuttle vector* A construct derived from the  
716 mutagenesis vector pLSV101 was used for *clpP2* deletion (pLSV101 was kindly  
717 provided by Prof. Dr. Thilo M. Fuchs) (Joseph et al., 2006). Ca. 1000 base pairs  
718 upstream and downstream from the *clpP2* gene were amplified by PCR using the A–B  
719 and C–D primer pairs from table 3 (Phusion polymerase, GC buffer, New England  
720 Biolabs). The PCR products were purified with E.Z.N.A. Gel Extraction Kit (Omega Bio-  
721 tek) after agarose gel electrophoresis. The fragments were digested with BgIII  
722 (Promega) and purified with E.Z.N.A. Cycle Pure Kit (Omega Bio-tek). The AB and CD  
723 fragments were ligated with T4 DNA ligase (New England Biolabs) (1:1 molar ratio, 15  
724 °C, overnight). The ligated fragment was amplified by PCR (Phusion polymerase, HF  
725 buffer) using the AB–CD primer pair (Table 3). The PCR product was purified with  
726 E.Z.N.A. Cycle Pure Kit (Omega Bio-tek). The insert and the empty pLSV101 vector  
727 were digested with Sall-HF and BamHI-HF (New England Biolabs) and purified with  
728 E.Z.N.A. Gel Extraction Kit (Omega Bio-tek) after agarose gel electrophoresis. The  
729 fragment was ligated into the pLSV101 vector (3:1 molar ratio) with T4 DNA ligase  
730 (New England Biolabs) (16 °C overnight). The ligated vector was transformed into  
731 chemically competent *E. coli* TOP10. *E. coli* containing pLSV101\_ $\Delta clpP2$  was grown  
732 with 300  $\mu$ g/mL erythromycin. Colonies were tested with colony PCR using  
733 pLSV101\_seq fwd and rev primers (Table 2). The vectors were purified with E.Z.N.A.  
734 Plasmid Mini Kit I (Omega Bio-tek) from positive colonies (elution with ddH<sub>2</sub>O) and  
735 sequenced by Sanger sequencing with pLSV101\_seq fwd and rev primers.

736

737 *Transformation into L. monocytogenes* Electrocompetent *L. monocytogenes* EGD-e  
738 and  $\Delta clpP1$  cells were prepared as described above. Aliquots of electrocompetent cells  
739 were thawed on ice and 2 or 5  $\mu$ g plasmid was added. The cells were transferred into

740 ice-cold 2 mm electroporation cuvettes (Bio-Rad) and electroporated (2500 V, 200  $\Omega$ ,  
741 25  $\mu$ F, exponential decay, time constant  $\sim$  4 ms) using Gene Pulser Xcell (Bio-Rad). 1  
742 mL warm BHI medium was added and the cells were incubated at 30 °C for 6 h under  
743 shaking at 200 rpm and plated on BHI agar plates with 10  $\mu$ g/mL erythromycin. The  
744 plates were incubated at 30 °C for 5 days.

745

746 *Homologous recombination and colony selection* 2.5 mL BHI medium with 10  $\mu$ g/mL  
747 erythromycin was inoculated with single colonies after transformation.  $10^{-2}$  and  $10^{-5}$   
748 dilutions were plated on BHI + 10  $\mu$ g/mL erythromycin agar plates and incubated at 42  
749 °C for 2 days. Colony PCR (OneTaq polymerase, New England Biolabs) with the  
750 primer pairs clp2\_KO\_A–pLSV101\_seq rev and pLSV101\_seq fwd–clpP2\_KO\_D (see  
751 Tables 2 and 3) was performed to check the genomic integration of the fragments.  
752 Positive colonies were subcultivated several times in 2.5 mL BHI medium without  
753 antibiotic at 30 °C (200 rpm).  $10^{-6}$  dilutions were plated on BHI agar plates (RT, 3 days).  
754 Single colonies were picked and transferred to BHI agar plates with and without 10  
755  $\mu$ g/mL erythromycin (37 °C, overnight). Erythromycin-sensitive strains were tested with  
756 colony PCR (OneTaq DNA polymerase, New England Biolabs) using the clpP2\_KO\_A  
757 and clpP2\_KO\_D primer pair (Table 3) to check for *clpP2* deletion.

758

### 759 **Western blot**

760 5 mL BHI medium was inoculated with *L. monocytogenes* EGD-e,  $\Delta$ *clpP1*,  $\Delta$ *clpP2* and  
761  $\Delta$ *clpP1/2* strains. An amount of cells corresponding to 200  $\mu$ L of OD<sub>600</sub> = 20 of each  
762 mutant was harvested (4000 g, 10 min, 4 °C). The cells were lysed by ultrasonication  
763 (3 $\times$ 20 s, 75%, cooled on ice during breaks). 2 $\times$  Laemmli buffer was added and 20  $\mu$ L  
764 sample was separated by SDS-PAGE (12.5% polyacrylamide, 150 V, 2.5 h). The  
765 proteins from the polyacrylamide gel were transferred to a methanol-soaked PVDF  
766 membrane (Bio-Rad) in a Trans-Blot SD semi-dry western blot cell (Bio-Rad) using  
767 blotting buffer (48 mM Trizma, 39 mM glycine, 0.04% SDS, 20% methanol) (10 V, 1 h).  
768 The membrane was blocked with 5% milk powder in PBS-T (0.5% Tween-20 in PBS)  
769 for 1 h at RT and subsequently incubated with rabbit polyclonal anti-ClpP antibody  
770 (custom-made, raised against *S. aureus* ClpP, 2 mg/mL, 1:1000 dilution) in PBS-T +  
771 5% milk powder (4 °C, overnight). The membrane was washed three times with PBS-  
772 T (15 min, RT) and incubated with Pierce Goat anti-Rabbit poly-HRP secondary  
773 antibody (1:10 000, Thermo Fisher Scientific) in PBS-T + 5% milk powder (1 h, RT).

774 The membrane was washed three times with PBS-T (15 min, RT) and  
775 chemiluminescence was detected after 10 min incubation with freshly prepared Clarity  
776 Western ECL Substrate (Bio-Rad) with a LAS-4000 gel scanning station (Fujitsu Life  
777 Sciences, Tokyo, Japan).

778

779 For detection of myc-tagged ClpP1 and ClpP2, pellets of *L. monocytogenes*  
780 *clpP1(191)::2xmyc* and *L. monocytogenes clpP2(199)::2xmyc* corresponding to 1 ml  
781 OD<sub>600</sub>=20 were prepared as described in the MS-based co-immunoprecipitation  
782 section without crosslinking. The pellets were resuspended in 200 µL 0.4% SDS-PBS  
783 and lysed by sonication (3x 20s, 75%, cooled on ice during breaks). Protein  
784 concentration was determined using a BCA assay (Roti-Quant universal, Carl Roth  
785 GmbH + Co. KG, Karlsruhe, Germany), all samples were adjusted to 4 mg/mL with 2x  
786 Laemmli buffer and 20 µL of the samples were separated by SDS-PAGE (12.5%  
787 polyacrylamide, 150 V, 2.5 h). Protein transfer and detection was performed as  
788 described above, with a 1:5000 dilution of an anti-c-Myc antibody (rabbit polyclonal,  
789 ab152146, 1 mg/mL, Abcam, Cambridge, United Kingdom) in PBS-T + 5% milk powder  
790 used as primary antibody and the membrane was stained with Ponceau S.

791

## 792 **Fluorescent labelling**

793 25 mL BHI medium was inoculated with *L. monocytogenes* EGD-e,  $\Delta clpP1$ ,  $\Delta clpP2$   
794 and  $\Delta clpP1/2$  from a day culture to an initial OD<sub>600</sub> of 0.05. The culture was grown to  
795 early stationary phase and an amount corresponding to 800 µL OD<sub>600</sub> = 20 was  
796 harvested (4000 g, 4 °C, 10 min). The cells were washed with 1 mL PBS (4000 g, 4  
797 °C, 5 min). The pellets were resuspended in 800 µL PBS and aliquots of 250 µL were  
798 prepared. 2.5 µL 5 mM vibralactone probe (or 5 mM D3 or DMSO as controls) from a  
799 DMSO stock was added to all strains (2 h, RT). The cells were centrifuged (4000 g,  
800 5 min, 4 °C), the supernatant was discarded, and the pellets were washed with 1 mL  
801 PBS (4000 g, 5 min, 4 °C). The pellets were stored at -80 °C until further usage. The  
802 cells were resuspended in 250 µL PBS and transferred to 2 mL tubes containing 0.5  
803 mL inlets filled with glass beads of 0.5 mm diameter. The cells were lysed using 2x  
804 program #2 in Precellys 24 tissue homogenizer (Bertin Instruments, Montigny-le-  
805 Bretonneux, France) coupled to liquid N<sub>2</sub>-cooled Cryolys (flow rate set to level I during  
806 shaking, level 0 during breaks). 200 µL of the lysates were pipetted into microcentrifuge  
807 tubes and the insoluble fractions were separated (10 000 g, 30 min, 4 °C). Click

808 reagents [2  $\mu$ L 5 mM rhodamine azide, 2  $\mu$ L 15 mg/mL TCEP, 6  $\mu$ L 1.67 mM tris((1-  
809 benzyl-4-triazolyl)methyl)amine ligand and 2  $\mu$ L 50 mM CuSO<sub>4</sub>] were added to 88  $\mu$ L  
810 of the supernatant and the reactions were incubated in the dark for 1 h at RT.  
811 2 $\times$ Laemmli buffer was added and the samples were stored at -20 °C until further  
812 usage. 50  $\mu$ L of the samples were separated by SDS-PAGE (12.5% polyacrylamide,  
813 150 V, 3 h) and fluorescence was detected with LAS-4000 gel scanning station (Fujitsu  
814 Life Sciences).

815

### 816 **Growth curves of *L. monocytogenes* mutants**

817 In the inner wells of a transparent flat-bottom 96-well plate, 200  $\mu$ L BHI medium (if  
818 required, supplemented with 100 ppm H<sub>2</sub>O<sub>2</sub>) were inoculated to a starting OD<sub>600</sub> of 0.01  
819 with overnight cultures of *L. monocytogenes* EDG-e and its mutants ( $\Delta clpP1$ ,  $\Delta clpP2$   
820 and  $\Delta clpP1/2$ ) or left sterile for blank measurements. The outer wells of the plate were  
821 filled with 200  $\mu$ L BHI medium but were not measured. The plate was covered with a  
822 transparent lid and was incubated at 37 °C with 5 s shaking every 15 min in an infinite  
823 M200Pro plate reader (Tecan). OD<sub>600</sub> was measured every 15 min for 24 h. Data was  
824 recorded in triplicates and at least two independent experiments were conducted with  
825 qualitatively identical results. Plots were made with GraphPad Prism 6.

826

### 827 **Intracellular growth assay**

828 *Cultivation of the J774A.1 cell line* J774A.1 murine macrophage-like cells were grown  
829 in tissue culture flasks with hydrophobic surface for suspension cells in DMEM/FCS  
830 (DMEM high glucose medium (Sigma-Aldrich, St. Louis, United States) supplemented  
831 with 2 mM glutamine and 10% heat-deactivated FCS). The flasks were incubated at  
832 37 °C under 5% CO<sub>2</sub>. The cells were splitted into new flasks every 2–3 days to ca.  
833 5 $\times$ 10<sup>4</sup> cells/cm<sup>2</sup>. For detachment, cells were washed twice with TEN buffer (40 mM  
834 Tris-HCl, 150 mM NaCl, 1 mM EDTA, pH 7.4) and incubated with Accutase solution  
835 (Sigma-Aldrich) at 37 °C for 30 min.

836

837 *Intracellular growth assay* 10<sup>5</sup> J774A.1 cells in 100  $\mu$ L DMEM/FCS were pipetted into  
838 the inner wells of a flat-bottom 96-well plate. The outer wells were filled with 150  $\mu$ L  
839 sterile PBS. The plates were incubated overnight at 37 °C under 5% CO<sub>2</sub>. On the next  
840 day, DMEM/FCS was inoculated with *L. monocytogenes* EDG-e,  $\Delta clpP1$ ,  $\Delta clpP2$  and  
841  $\Delta clpP1/2$  overnight cultures to 10<sup>3</sup> CFU/ $\mu$ L. The J774A.1 cells were washed with

842 150  $\mu$ L PBS and 100  $\mu$ L bacterial suspension was added (multiplicity of  
843 infection = 0.5). The plate was incubated on ice for 15 min and at 37 °C for 15 min.  
844 The cells were washed three times with 200  $\mu$ L PBS. 150  $\mu$ L DMEM/FCS  
845 supplemented with 10  $\mu$ L gentamycin was added to kill extracellular bacteria. The  
846 plates were incubated at 37 °C under 5% CO<sub>2</sub>. After 7 h, the cells were washed three  
847 times with 200  $\mu$ L PBS, and lysed with 2 $\times$  100  $\mu$ L 0.05% Triton X-100 in ddH<sub>2</sub>O  
848 (1 min, RT). Dilution series were prepared from the lysates and plated on BHI agar  
849 plates. The agar plates were incubated at 37 °C for 2 days until colonies were counted.  
850 Data was recorded in triplicates and two independent experiments were performed.  
851 Plots were made with GraphPad Prism 6.

852

### 853 **Whole-proteome analysis**

854 *Cultivation of L. monocytogenes* 3 $\times$ 5 mL BHI medium (3 technical replicates) were  
855 inoculated 1:100 with overnight cultures of *L. monocytogenes* EGD-e,  $\Delta clpP1$ ,  $\Delta clpP2$   
856 and  $\Delta clpP1/2$ . The first day culture was grown to an OD<sub>600</sub> of ca. 0.5 at 37 °C under  
857 shaking at 200 rpm. For the second day culture, 3 $\times$ 5 mL BHI medium was inoculated  
858 with the first day culture to a starting OD<sub>600</sub> of 0.05 and incubated at 37 °C or 42 °C  
859 under shaking at 200 rpm. After reaching early stationary phase, 1.5 mL of the cultures  
860 were harvested (4000 g, 10 min, 4 °C). The pellet was washed with 1 mL PBS and  
861 stored at -80 °C until further usage. Two biological replicates were generated.

862

863 *Cell lysis and protein precipitation* Bacteria were resuspended in 150  $\mu$ L lysis buffer  
864 (1% Triton X100, 0.5% SDS, 1 tablet cOmplete EDTA-free protease inhibitor cocktail  
865 (Roche Diagnostics GmbH, Mannheim, Germany) in 10 mL PBS) and lysed by  
866 ultrasonication (5 $\times$ 20 s, 80%, on ice during breaks). Cell debris was pelletized (5000  
867 g, 10 min, 4 °C) and the supernatant was sterile filtered through a 0.2  $\mu$ m pore size  
868 PTFE filter. Protein concentration was determined using a BCA assay (Roti-Quant  
869 universal, Carl Roth GmbH + Co. KG), all samples were adjusted to the same volume  
870 and concentration (ca. 1 mg/mL) and transferred to protein low-bind microcentrifuge  
871 tubes (Eppendorf, Hamburg, Germany). To precipitate the proteins, 4 $\times$  sample volume  
872 acetone (-80 °C) was added and the samples were stored at -80 °C overnight. The  
873 samples were centrifuged at 21 000 g at 4 °C for 15 min and the supernatant was  
874 discarded. The pellet was resuspended in 500  $\mu$ L methanol (-80 °C) with



875 ultrasonication (10 s, 10%). After centrifugation at 21 000 g and at 4 °C for 15 min, the  
876 supernatant was discarded and the pellet was air-dried.

877

878 *Sample preparation for LC-MS/MS* 200 µL X buffer (7 M urea, 2 M thiourea, 20 mM  
879 HEPES, pH 7.5) was added and the pellet was resuspended by ultrasonication  
880 (10 s, 10%). The samples were reduced by the addition of 0.2 µL 1 M DTT (45 min,  
881 RT, 450 rpm), alkylated with 2 µL 0.55 M iodoacetamide (IAA) (30 min, RT, 450 rpm)  
882 and the reaction was quenched with 0.8 µL 1 M DTT (30 min, RT, 450 rpm). The  
883 samples were pre-digested with 0.5 µg/µL LysC (2 h, RT, 450 rpm). For the tryptic  
884 digest, 600 µL 50 mM triethylammonium bicarbonate (TEAB) buffer and 0.5 µg/µL  
885 trypsin (sequencing grade, modified, Promega) was added (overnight, 37 °C, 450 rpm).  
886 The pH was set to < 3 with 10 µL formic acid (FA). The samples were desalted on a  
887 Sep-Pak C18 50 mg column (Waters) using gravity flow. The columns were  
888 equilibrated with 1 mL MeCN, 0.5 mL 80% MeCN + 0.5% FA and 3x 1 mL 0.1%  
889 trifluoroacetic acid (TFA). The samples were loaded on the column and washed with  
890 2x 1 mL 0.1% TFA and with 250 µL 0.5% FA. The peptides were eluted with 3x 250 µL  
891 MeCN, 0.5 mL 80% MeCN + 0.5% FA using vacuum in the last step. The solvents  
892 were removed under vacuum at 30 °C and the samples were resuspended in 1% FA  
893 (volume set to 2 µg/µL protein concentration), with pipetting up and down, 15 min  
894 ultrasonication in water bath and vortexing. The samples were filtered through a 0.2 µm  
895 pore size centrifugal filter.

896

897 *LC-MS/MS* Samples were analyzed by LC-MS/MS using an UltiMate 3000 nano  
898 HPLC system (Thermo Fisher Scientific) equipped with an Acclaim C18 PepMap100  
899 75 µm ID x 2 cm trap and an Aurora C18 separation column (75 µm ID x 25 cm,  
900 Ionopticks, Fitzroy, Australia) coupled to an Orbitrap Fusion (Thermo Fisher Scientific).  
901 Whole proteome and anti-ClpP XL-co-IP experiments performed at 37 °C were  
902 analyzed with the same setup, but with an Acclaim Pepmap RSLC C18 separation  
903 column (75 µm ID x 50 cm) in an EASY-spray setting. Injected samples were loaded  
904 on the trap column with a flow rate of 5 µL/min with 0.1% TFA buffer and then  
905 transferred onto the separation column at a flow rate of 0.4 µL/min (0.3 µL/min in case  
906 an Acclaim Pepmap RSLC C18 separation column was used). Samples were  
907 separated using a 152 min gradient (buffer A: H<sub>2</sub>O with 0.1% FA, buffer B: MeCN with  
908 0.1% FA, gradient: 5% buffer B for 7 min, from 5% to 22% buffer B in 105 min, then to

909 32% buffer B in 10 min, to 90% buffer B in 10 min and hold at 90% buffer B for 10 min,  
910 then to 5% buffer B in 0.1 min and hold 5% buffer B for 9.9 min). Peptides were ionized  
911 using a nanospray source at 1.7–1.9 kV and a capillary temperature of 275 °C. The  
912 instrument was operated in a top speed data dependent mode with a cycle time  
913 between master scans of 3 s. MS full scans were performed in the orbitrap with  
914 quadrupole isolation at a resolution of  $R = 120\,000$  and an automatic gain control  
915 (AGC) ion target value of  $2 \times 10^5$  in a scan range of 300–1500 m/z with a maximum  
916 injection time of 50 ms. Internal calibration was performed using the ion signal of  
917 fluoranthene cations (EASY-ETD/IC source). Dynamic exclusion time was set to 60 s  
918 with a mass tolerance of 10 ppm (low/high). Precursors with intensities higher than  
919  $5 \times 10^3$  and charge states 2–7 were selected for fragmentation with HCD (30%). MS2  
920 scans were recorded in the ion trap operating in a rapid mode with an isolation window  
921 of 1.6 m/z. The AGC target was set to  $1 \times 10^4$  with a maximum injection time of 35 ms  
922 (100 ms in case of the temperature-dependent co-IP with anti-c-Myc antibody) and the  
923 “inject ions for all available parallelizable time” was enabled.

924  
925 *Data analysis* MS raw data were analyzed with MaxQuant 1.6.5.0 and default settings  
926 were used, except for the following: label-free quantification and match between runs  
927 were activated. All replicates for one condition ( $n = 6$ ) were set as one fraction. The  
928 UniProt database of *L. monocytogenes* EGD-e proteins (taxon ID: 169963,  
929 downloaded on 25.01.2019) was searched. Data was further analyzed with Perseus  
930 1.6.2.3. The rows “only identified by site”, “potential contaminants” and “reverse” were  
931 filtered and the data were  $\log_2$ -transformed. Replicates were grouped and filtered to at  
932 least 4 valid values per at least one group. Missing values were imputed for the total  
933 matrix from normal distribution. Two-sample Student’s *t*-tests were performed with  
934 default settings. Iron containing proteins were searched for with the UniProt Keyword  
935 “Iron”. SOS response proteins were identified from van der Veen et al (van der Veen  
936 et al., 2010). UniProt keyword and GOBP term analyses were performed with aGOtool  
937 (agotool.org) (Schölz et al., 2015). Proteins with a fold change of  $\geq 2$  (upregulated) or  
938  $\leq -2$  (downregulated) and a  $-\log_{10}$  t-test *p*-value  $\geq 1.3$  were set as foreground.  
939 “compare\_samples” was selected as enrichment method with majority protein IDs from  
940 the wild type whole proteome used as background. A *p*-value cutoff of 0.05 was set  
941 and overrepresented terms as well as multiple testing per category was used with no

942 GO term subset. Terms associated with only one proteins as well as redundant parent  
943 terms were filtered.

944

## 945 **MS-based co-immunoprecipitation**

946

### 947 **Temperature-dependent co-IP with anti-c-Myc antibody**

948 *Cultivation of L. monocytogenes with c-Myc-tagged clpP* 30 mL BHI medium were  
949 inoculated 1:100 with overnight cultures of *L. monocytogenes clpP1(191)::2xmyc* and  
950 *L. monocytogenes clpP2(199)::2xmyc*. The first day culture was grown to an OD<sub>600</sub> of  
951 ca. 0.5 at 37 °C under shaking at 200 rpm. For the second day culture, 4x100 mL BHI  
952 medium was inoculated with the first day cultures to a starting OD<sub>600</sub> of 0.05. 2 flasks  
953 per condition were incubated at 20 °C and at 42 °C under shaking at 200 rpm. After  
954 reaching early stationary phase, an amount of bacteria corresponding to 4x1 mL OD<sub>600</sub>  
955 = 20 per flask was harvested (4000 g, 5 min, 4 °C) and washed with 1 mL PBS. The  
956 pellets were resuspended in 1 mL PBS and 2 mM DSSO was added (20 µL from a 100  
957 mM DMSO stock). DSSO was kindly provided by Dr. Vadim Korotkov and Dr. Pavel  
958 Kielkowski and synthesized as described previously (Fux et al., 2019). The bacteria  
959 were incubated with the crosslinker for 30 min at 20 °C or 42 °C under shaking at 200  
960 rpm. The reaction was quenched by washing twice with 50 mM Tris-HCl (pH 8.0) and  
961 the pellets were stored at -80 °C until further usage.

962

963 *Cell lysis and co-IP* Bacteria were resuspended in 800 µL co-IP lysis buffer (50 mM  
964 Tris-HCl, 150 mM NaCl, 5% glycerol, pH 7.4) and 120 µg lysozyme was added. The  
965 samples were incubated at 37 °C under shaking at 1400 rpm for 1 h. Afterwards, 8 µL  
966 10% NP-40 solution was added and the bacteria were lysed by ultrasonication (5x30 s,  
967 80%, on ice during breaks). The insoluble fraction was pelletized (10 000 g, 30 min,  
968 4 °C) and the supernatant was sterile filtered through a 0.2 µm PTFE filter. Protein  
969 concentration was determined using a BCA assay (Roti-Quant universal, Carl Roth  
970 GmbH + Co. KG). 30 µL Protein A/G agarose beads (Thermo Fisher Scientific) were  
971 transferred to protein low-bind microcentrifuge tubes (Eppendorf) and washed with 1  
972 mL co-IP wash buffer (50 mM Tris-HCl, 150 mM NaCl, 5% glycerol, 0.05% NP-40, pH  
973 7.4) and centrifuged for 1 min at 1000 g at 4 °C. 500 µg proteome (in 500 µL) and  
974 either 1 µL anti-c-Myc antibody (rabbit polyclonal, ab152146, 1 mg/mL, Abcam) or 0.4  
975 µL isotype control (2.5 mg/mL, Cell Signaling Technology, Danvers, United States)

976 were added. The samples were incubated at 4 °C for 3 h under constant rotation. The  
977 supernatant was removed after centrifugation (1000 g, 1 min, 4 °C), and the beads  
978 were washed twice with 1 mL co-IP wash buffer. The detergent was removed by  
979 washing the beads twice with co-IP lysis buffer.

980

981 *Sample preparation for LC-MS/MS* The samples were reduced and digested in 25 µL  
982 co-IP digest buffer (50 mM Tris-HCl, 5 ng/µL trypsin (sequencing grade, modified,  
983 Promega), 2 M urea, 1 mM DTT, pH 8.0) at 25 °C under shaking at 600 rpm for 30 min.  
984 For alkylation, 100 µL 50 mM Tris-HCl, 2 mM urea, 5 mM IAA (pH 8.0) was added (25  
985 °C, 600 rpm, 30 min). The digestion was completed overnight at 37 °C under shaking  
986 at 600 rpm. The pH was set to < 3 with 0.75 µL FA. The samples were desalted on  
987 double layer C18-stage tips (Empore disk-C18, Agilent Technologies, Santa Clara,  
988 United States). The stage tips were equilibrated with 70 µL methanol and 3× 70 µL  
989 0.5% FA. The samples were loaded and washed with 3× 70 µL 0.5% FA. The peptides  
990 were eluted with 3× 30 µL 80% MeCN + 0.5% FA. The solvents were removed under  
991 vacuum at 30 °C and the samples were resuspended in 27 µL 1% FA with pipetting up  
992 and down, 15 min ultrasonication in water bath and vortexing. The samples were  
993 filtered through a 0.2 µm pore size centrifugal filter. LC-MS/MS measurement was  
994 conducted as described for the whole proteome analysis.

995

996 *Data analysis* MS raw data were analyzed with MaxQuant 1.6.10.43. and default  
997 settings were used, except for the following: label-free quantification and match  
998 between runs were activated, *N*-acetylation modification was deactivated. All replicates  
999 for one condition (n = 4) were set as one fraction. The UniProt database of  
1000 *L. monocytogenes* EGD-e proteins (taxon ID: 169963, downloaded on 21.10.2019.)  
1001 was searched. Data was further analyzed with Perseus 1.6.10.43. The rows "only  
1002 identified by site", "potential contaminants" and "reverse" were filtered and the data  
1003 were log<sub>2</sub>-transformed. Replicates were grouped and filtered to at least 3 valid values  
1004 per at least one group. Missing values were imputed for the total matrix from normal  
1005 distribution. Two-sample Student's *t*-tests were performed with default settings.

1006

### 1007 **Co-IP with anti-clpP antibody**

1008 20 mL BHI medium was inoculated 1:100 with overnight cultures of *L. monocytogenes*  
1009  $\Delta clpP1$  and  $\Delta clpP2$ . The first day culture was grown to an OD<sub>600</sub> of ca. 0.5 at 37 °C

1010 under shaking at 200 rpm. For the second day culture, 50 mL BHI medium was  
1011 inoculated with the first day cultures to a starting OD<sub>600</sub> of 0.05 and incubated at 37 °C  
1012 or 42 °C under shaking at 200 rpm. After reaching early stationary phase, an amount  
1013 of bacteria corresponding to 2×1 mL OD<sub>600</sub> = 20 per replicate was harvested (4000 g,  
1014 5 min, 4 °C) and washed with 1 mL PBS. The pellets were resuspended in 1 mL PBS  
1015 and 2 mM DSSO was added (20 µL from a 100 mM DMSO stock). The bacteria were  
1016 incubated with the crosslinker for 30 min at 37 °C or 42 °C and under shaking at 200  
1017 rpm. The reaction was quenched by washing twice with 50 mM Tris-HCl (pH 8.0) and  
1018 the pellets were stored at –80 °C until further usage. Four replicates from independent  
1019 overnight cultures were generated for each experiment.

1020 Cell lysis, co-IP and sample preparation were conducted as described for the  
1021 temperature-dependent co-IP with anti-c-Myc antibody, except that either 5 µL anti-  
1022 ClpP antibody (custom-made, polyclonal, raised against *S. aureus* ClpP in rabbit, 2  
1023 mg/mL) or 4 µL isotype control (2.5 mg/mL, Cell Signaling Technology) were used. 300  
1024 µg proteome was used in case of the 42 °C XL-co-IP. LC-MS/MS measurements and  
1025 data analysis was done as described for the temperature-dependent co-IP with anti-c-  
1026 Myc antibody. Oxidoreductases were searched for with the UniProt Keyword  
1027 "Oxidoreductase".

1028

## 1029 **References**

1030

1031 Arnaud, M., Chastanet, A., & Débarbouillé, M. (2004). New Vector for Efficient Allelic  
1032 Replacement in Naturally Nontransformable, Low-GC-Content, Gram-Positive  
1033 Bacteria. *Applied and Environmental Microbiology*, 70(11), 6887-6891.  
1034 <https://doi.org/10.1128/aem.70.11.6887-6891.2004>

1035

1036 Baker, T. A., & Sauer, R. T. (2012). ClpXP, an ATP-powered unfolding and protein-  
1037 degradation machine. *Biochimica et Biophysica Acta*, 1823(1), 15-28.  
1038 <https://doi.org/10.1016/j.bbamcr.2011.06.007>

1039

1040 Balogh, D., Dahmen, M., Stahl, M., Poreba, M., Gersch, M., Drag, M., & Sieber, S. A.  
1041 (2017). Insights into ClpXP proteolysis: heterooligomerization and partial deactivation  
1042 enhance chaperone affinity and substrate turnover in *Listeria monocytogenes*.  
1043 *Chemical Science*, 8(2), 1592-1600. <https://doi.org/10.1039/C6SC03438A>

1044

1045 Bucur, F. I., Grigore-Gurgu, L., Crauwels, P., Riedel, C. U., & Nicolau, A. I. (2018).  
1046 Resistance of *Listeria monocytogenes* to stress conditions encountered in food and

- 1047 food processing environments. *Frontiers in Microbiology*, 9, 2700-2700.  
1048 <https://doi.org/10.3389/fmicb.2018.02700>
- 1049  
1050 Cohn, M. T., Kjølgaard, P., Frees, D., Penadés, J. R., & Ingmer, H. (2011). Clp-  
1051 dependent proteolysis of the LexA N-terminal domain in *Staphylococcus aureus*.  
1052 *Microbiology*, 157(3), 677-684. <https://doi.org/10.1099/mic.0.043794-0>
- 1053  
1054 Dahmen, M., Vielberg, M. T., Groll, M., & Sieber, S. A. (2015). Structure and  
1055 mechanism of the caseinolytic protease ClpP1/2 heterocomplex from *Listeria*  
1056 *monocytogenes*. *Angew. Chem. Int. Ed.*, 54(12), 3598-3602.  
1057 <https://doi.org/10.1002/anie.201409325>
- 1058  
1059 Farrand, A. J., Friedman, D. B., Reniere, M. L., Ingmer, H., Frees, D., & Skaar, E. P.  
1060 (2015). Proteomic analyses of iron-responsive, Clp-dependent changes in  
1061 *Staphylococcus aureus*. *Pathogens and Disease*, 73(3), ftv004-ftv004.  
1062 <https://doi.org/10.1093/femspd/ftv004>
- 1063  
1064 Feng, J., Michalik, S., Varming, A. N., Andersen, J. H., Albrecht, D., Jelsbak, L.,  
1065 Krieger, S., Ohlsen, K., Hecker, M., Gerth, U., Ingmer, H., & Frees, D. (2013). Trapping  
1066 and proteomic identification of cellular substrates of the ClpP protease in  
1067 *Staphylococcus aureus*. *Journal of Proteome Research*, 12(2), 547-558.  
1068 <https://doi.org/10.1021/pr300394r>
- 1069  
1070 Flynn, J. M., Neher, S. B., Kim, Y. I., Sauer, R. T., & Baker, T. A. (2003). Proteomic  
1071 discovery of cellular substrates of the ClpXP protease reveals five classes of ClpX-  
1072 recognition signals. *Molecular Cell*, 11(3), 671-683. [https://doi.org/10.1016/S1097-2765\(03\)00060-1](https://doi.org/10.1016/S1097-2765(03)00060-1)
- 1073  
1074  
1075 Frees, D., Qazi, S. N., Hill, P. J., & Ingmer, H. (2003). Alternative roles of ClpX and  
1076 ClpP in *Staphylococcus aureus* stress tolerance and virulence. *Molecular*  
1077 *Microbiology*, 48(6), 1565-1578. <https://doi.org/10.1046/j.1365-2958.2003.03524.x>
- 1078  
1079  
1080 Fux, A., Korotkov, V. S., Schneider, M., Antes, I., & Sieber, S. A. (2019). Chemical  
1081 cross-linking enables drafting ClpXP proximity maps and taking snapshots of in situ  
1082 interaction networks. *Cell Chemical Biology*, 26(1), 48-59.  
1083 <https://doi.org/10.1016/j.chembiol.2018.10.007>.
- 1084  
1085 Gaillot, O., Pellegrini, E., Bregenholt, S., Nair, S., & Berche, P. (2000). The ClpP serine  
1086 protease is essential for the intracellular parasitism and virulence of *Listeria*  
1087 *monocytogenes*. *Molecular Microbiology*, 35(6), 1286-1294.  
1088 <https://doi.org/10.1046/j.1365-2958.2000.01773.x>
- 1089

- 1090 Gatsogiannis, C., Balogh, D., Merino, F., Sieber, S. A., & Raunser, S. (2019). Cryo-EM  
1091 structure of the ClpXP protein degradation machinery. *Nature Structural & Molecular*  
1092 *Biology*, 26, 946–954. <https://doi.org/10.1038/s41594-019-0304-0>  
1093
- 1094 Guillon, B., Bulteau, A.-L., Wattenhofer-Donzé, M., Schmucker, S., Friguet, B., Puccio,  
1095 H., Drapier, J.-C., & Bouton, C. (2009). Frataxin deficiency causes upregulation of  
1096 mitochondrial Lon and ClpP proteases and severe loss of mitochondrial Fe-S proteins.  
1097 *The FEBS Journal*, 276(4), 1036-1047. [https://doi.org/10.1111/j.1742-](https://doi.org/10.1111/j.1742-4658.2008.06847.x)  
1098 [4658.2008.06847.x](https://doi.org/10.1111/j.1742-4658.2008.06847.x)  
1099
- 1100 Hall, B. M., Breidenstein, E. B. M., de la Fuente-Núñez, C., Reffuveille, F., Mawla, G.  
1101 D., Hancock, R. E. W., & Baker, T. A. (2017). Two isoforms of Clp peptidase in  
1102 *Pseudomonas aeruginosa* control distinct aspects of cellular physiology. *Journal of*  
1103 *Bacteriology*, 199(3), e00568-00516. <https://doi.org/10.1128/JB.00568-16>  
1104
- 1105 Huisgen, R. (1961). 1,3-Dipolar cycloadditions. *Proceedings of the Chemical Society*,  
1106 357-396. <https://doi.org/10.1039/PS9610000357>  
1107
- 1108 Joseph, B., Przybilla, K., Stühler, C., Schauer, K., Slaghuis, J., Fuchs, T. M., & Goebel,  
1109 W. (2006). Identification of *Listeria monocytogenes* Genes Contributing to Intracellular  
1110 Replication by Expression Profiling and Mutant Screening. *Journal of Bacteriology*,  
1111 188(2), 556-568. <https://doi.org/10.1128/jb.188.2.556-568.2006>  
1112
- 1113 Kawai, Y., Moriya, S., & Ogasawara, N. (2003). Identification of a protein, YneA,  
1114 responsible for cell division suppression during the SOS response in *Bacillus subtilis*.  
1115 *Molecular Microbiology*, 47(4), 1113-1122. [https://doi.org/10.1046/j.1365-](https://doi.org/10.1046/j.1365-2958.2003.03360.x)  
1116 [2958.2003.03360.x](https://doi.org/10.1046/j.1365-2958.2003.03360.x)  
1117
- 1118 Kim, Y. I., Burton, R. E., Burton, B. M., Sauer, R. T., & Baker, T. A. (2000). Dynamics  
1119 of substrate denaturation and translocation by the ClpXP degradation machine.  
1120 *Molecular Cell*, 5(4), 639-648. [https://doi.org/10.1016/S1097-2765\(00\)80243-9](https://doi.org/10.1016/S1097-2765(00)80243-9)  
1121
- 1122 Kirsch, V. C., Fetzter, C., & Sieber, S. A. (2021, 2021/01/01). Global Inventory of ClpP-  
1123 and ClpX-Regulated Proteins in *Staphylococcus aureus*. *Journal of Proteome*  
1124 *Research*, 20(1), 867-879. <https://doi.org/10.1021/acs.jproteome.0c00668>  
1125
- 1126 Kisker, C., Kuper, J., & Van Houten, B. (2013, Mar 1). Prokaryotic nucleotide excision  
1127 repair. *Cold Spring Harb Perspect Biol*, 5(3), a012591.  
1128 <https://doi.org/10.1101/cshperspect.a012591>  
1129
- 1130 Leodolter, J., Warweg, J., & Weber-Ban, E. (2015). The *Mycobacterium tuberculosis*  
1131 ClpP1P2 Protease Interacts Asymmetrically with Its ATPase Partners ClpX and ClpC1.  
1132 *PLOS ONE*, 10(5), e0131132. <https://doi.org/10.1371/journal.pone.0125345>  
1133

- 1134 Li, M., Kandrór, O., Akopian, T., Dharkar, P., Wlodawer, A., Maurizi, M. R., & Goldberg,  
1135 A. L. (2016). Structure and Functional Properties of the Active Form of the Proteolytic  
1136 Complex, ClpP1P2, from *Mycobacterium tuberculosis*. *Journal of Biological Chemistry*,  
1137 291(14), 7465-7476. <https://doi.org/10.1074/jbc.M115.700344>  
1138
- 1139 Little, J. W., & Gellert, M. (1983). The SOS regulatory system: control of its state by  
1140 the level of RecA protease. *Journal of Molecular Biology*, 167(4), 791-808.  
1141 [https://doi.org/10.1016/s0022-2836\(83\)80111-9](https://doi.org/10.1016/s0022-2836(83)80111-9)  
1142
- 1143 Mawla, G. D., Hall, B. M., Cárcamo-Oyarce, G., Grant, R. A., Zhang, J. J., Kardon, J.  
1144 R., Ribbeck, K., Sauer, R. T., & Baker, T. A. (2020). ClpP1P2 peptidase activity  
1145 promotes biofilm formation in *Pseudomonas aeruginosa*. *Molecular Microbiology*(00:),  
1146 1-16. <https://doi.org/10.1111/mmi.14649>  
1147
- 1148 Michel, A., Agerer, F., Hauck, C. R., Herrmann, M., Ullrich, J., Hacker, J., & Ohlsen, K.  
1149 (2006). Global regulatory impact of ClpP protease of *Staphylococcus aureus* on  
1150 regulons involved in virulence, oxidative stress response, autolysis, and DNA repair.  
1151 *Journal of Bacteriology*, 188(16), 5783-5796. <https://doi.org/10.1128/JB.00074-06>  
1152
- 1153
- 1154 Michel, B. (2005). After 30 years of study, the bacterial SOS response still surprises  
1155 us. *PLoS Biology*, 3(7), 1174-1176. <https://doi.org/10.1371/journal.pbio.0030255>  
1156
- 1157
- 1158 Miller, C., Thomsen, L. E., Gaggero, C., Mosseri, R., Ingmer, H., & Cohen, S. N. (2004).  
1159 SOS response induction by  $\beta$ -lactams and bacterial defense against antibiotic lethality.  
1160 *Science*, 305(5690), 1629-1631. <https://doi.org/10.1126/science.1101630>  
1161
- 1162 Nair, S., Derré, I., Msadek, T., Gaillot, O., & Berche, P. (2000). CtsR controls class III  
1163 heat shock gene expression in the human pathogen *Listeria monocytogenes*.  
1164 *Molecular Microbiology*, 35(4), 800-811. <https://doi.org/10.1046/j.1365-2958.2000.01752.x>.  
1165
- 1166
- 1167 Neher, S. B., Flynn, J. M., Sauer, R. T., & Baker, T. A. (2003). Latent ClpX-recognition  
1168 signals ensure LexA destruction after DNA damage. *Genes Dev.*, 17(9), 1084-1089.  
1169 <https://doi.org/10.1101/gad.1078003>  
1170
- 1171 Pan, S., Malik, I. T., Thomy, D., Henrichfreise, B., & Sass, P. (2019). The functional  
1172 ClpXP protease of *Chlamydia trachomatis* requires distinct clpP genes from separate  
1173 genetic loci. *Scientific Reports*, 9(1), 1-14. <https://doi.org/10.1038/s41598-019-50505-5>  
1174 [5](#)  
1175
- 1176 Radoshevich, L., & Cossart, P. (2018). *Listeria monocytogenes*: towards a complete  
1177 picture of its physiology and pathogenesis. *Nature Reviews Microbiology*, 16(1), 32-  
1178 46. <https://doi.org/10.1038/nrmicro.2017.126>



- 1179  
1180 Rostovtsev, V. V., Green, J. G., Fokin, V. V., & Sharpless, K. B. (2002). A stepwise  
1181 Huisgen cycloaddition process: copper(I)-catalyzed regioselective "ligation" of azides  
1182 and terminal alkynes. *Angew. Chem. Int. Ed.*, *41*, 2596-2599.  
1183 [https://doi.org/10.1002/1521-3773\(20020715\)41:14<2596::AID-ANIE2596>3.0.CO;2-](https://doi.org/10.1002/1521-3773(20020715)41:14<2596::AID-ANIE2596>3.0.CO;2-4)  
1184 [4](https://doi.org/10.1002/1521-3773(20020715)41:14<2596::AID-ANIE2596>3.0.CO;2-4)  
1185  
1186 Schölz, C., Lyon, D., Refsgaard, J. C., Jensen, L. J., Choudhary, C., & Weinert, B. T.  
1187 (2015). Avoiding abundance bias in the functional annotation of posttranslationally  
1188 modified proteins. *Nature Methods*, *12*(11), 1003-1004.  
1189 <https://doi.org/10.1038/nmeth.3621>  
1190  
1191 Schulz, A., & Schumann, W. (1996). hrcA, the first gene of the *Bacillus subtilis* dnaK  
1192 operon encodes a negative regulator of class I heat shock genes. *Journal of*  
1193 *Bacteriology*, *178*(4), 1088-1093. <https://doi.org/10.1128/jb.178.4.1088-1093.1996>  
1194  
1195  
1196 Speziali, C. D., Dale, S. E., Henderson, J. A., Vinés, E. D., & Heinrichs, D. E. (2006).  
1197 Requirement of *Staphylococcus aureus* ATP-Binding cassette-ATPase FhuC for iron-  
1198 restricted growth and evidence that it functions with more than one iron transporter.  
1199 *Journal of Bacteriology*, *188*(6), 2048-2055. [https://doi.org/10.1128/jb.188.6.2048-](https://doi.org/10.1128/jb.188.6.2048-2055.2006)  
1200 [2055.2006](https://doi.org/10.1128/jb.188.6.2048-2055.2006)  
1201  
1202 Tornøe, C. W., Christensen, C., & Meldal, M. (2002). Peptidotriazoles on Solid Phase:  
1203 [1,2,3]-Triazoles by Regiospecific Copper(I)-Catalyzed 1,3-Dipolar Cycloadditions of  
1204 Terminal Alkynes to Azides. *Journal of Organic Chemistry*, *67*, 3057-3064.  
1205 <https://doi.org/10.1021/jo011148j>  
1206  
1207 Van Der Veen, S., Abee, T., De Vos, W. M., & Wells-Bennik, M. H. J. (2009). Genome-  
1208 wide screen for *Listeria monocytogenes* genes important for growth at high  
1209 temperatures. *FEMS Microbiology Letters*, *295*(2), 195-203.  
1210 <https://doi.org/10.1111/j.1574-6968.2009.01586.x>  
1211  
1212 van der Veen, S., Hain, T., Wouters, J. A., Hossain, H., de Vos, W. M., Abee, T.,  
1213 Chakraborty, T., & Wells-Bennik, M. H. J. (2007). The heat-shock response of *Listeria*  
1214 *monocytogenes* comprises genes involved in heat shock, cell division, cell wall  
1215 synthesis, and the SOS response. *Microbiology*, *153*(10), 3593-3607.  
1216 <https://doi.org/10.1099/mic.0.2007/006361-0>  
1217  
1218 van der Veen, S., van Schalkwijk, S., Molenaar, D., De Vos, W. M., Abee, T., & Wells-  
1219 Bennik, M. H. J. (2010). The SOS response of *Listeria monocytogenes* is involved in  
1220 stress resistance and mutagenesis. *Microbiology*, *156*(2), 374-384.  
1221 <https://doi.org/10.1099/mic.0.035196-0>  
1222

- 1223 Wu, C.-L., Li, Y.-H., Lin, H.-C., Yeh, Y.-H., Yan, H.-Y., Hsiao, C.-D., Hui, C.-F., & Wu,  
1224 J.-L. (2011). Activity and function of rabbit muscle-specific creatine kinase at low  
1225 temperature by mutation at gly268 to asn268. *Comparative Biochemistry and*  
1226 *Physiology Part B: Biochemistry and Molecular Biology*, 158(3), 189-198.  
1227 <https://doi.org/10.1016/j.cbpb.2010.11.009>  
1228
- 1229 Zeiler, E., Braun, N., Bottcher, T., Kastenmuller, A., Weinkauff, S., & Sieber, S. A.  
1230 (2011). Vibrilactone as a tool to study the activity and structure of the ClpP1P2  
1231 complex from *Listeria monocytogenes*. *Angew. Chem. Int. Ed.*, 50(46), 11001-11004.  
1232 <https://doi.org/10.1002/anie.201104391>  
1233
- 1234 Zeiler, E., List, A., Alte, F., Gersch, M., Wachtel, R., Poreba, M., Drag, M., Groll, M., &  
1235 Sieber, S. A. (2013). Structural and functional insights into caseinolytic proteases  
1236 reveal an unprecedented regulation principle of their catalytic triad. *Proceedings of the*  
1237 *National Academy of Sciences*, 110(28), 11302-11307.  
1238 <https://doi.org/10.1073/pnas.1219125110>  
1239  
1240
- 1241  
1242
